1  
2  
3  
4  
5  
6  
7  
8  
9  
10  
11  
12  
13  
14  
15  
16  
17  
18  
19  
20  
21  
22  
23  
24  
25  
26  
27  
28  
29  
30  
31  
32  
33  
34  
35  
36  
37  
38  
39  
40  
41

## mTORC1 controls glycogen synthase kinase 3 $\beta$ nuclear localization and function

Stephen J. Bautista<sup>1</sup>, Ivan Boras<sup>1</sup>, Adriano Vissa<sup>3,4</sup>, Noa Mecica<sup>1</sup>, Christopher M. Yip<sup>3,5,6</sup>, Peter K. Kim<sup>4,5</sup> and Costin N. Antonescu<sup>1,2</sup>

<sup>1</sup> Department of Chemistry and Biology and Graduate Program in Molecular Science, Ryerson University, Toronto Ontario, Canada, M5B 2K3

<sup>2</sup> Keenan Research Centre for Biomedical Science of St. Michael's Hospital, Toronto, Ontario, Canada, M5B 1W8

<sup>3</sup> Institute of Biomaterials and Biomedical Engineering, University of Toronto, Toronto, Ontario, Canada, M5S 3E5

<sup>4</sup> Program in Cell Biology, The Hospital for Sick Children, Toronto, Ontario, Canada, M5G 0A4

<sup>5</sup> Department of Biochemistry, University of Toronto, Toronto, Canada M5G 1X8

<sup>6</sup> Department of Chemical Engineering and Applied Chemistry, University of Toronto, Toronto, Canada, M5S 3E5

**Running Title:** mTORC1 regulates GSK3 $\beta$

**Keywords:** c-myc, snail, lysosome, metabolism, AMPK, Akt

**Summary statement** (15-30 words): GSK3 $\beta$  nuclear localization and function is negatively regulated by the metabolic and mitogenic sensor mTORC1. mTORC1 control of GSK3 $\beta$  localization requires Rab7 and lysosomal membrane traffic.

42 **Abstract**

43

44 Glycogen synthase kinase 3 $\beta$  (GSK3 $\beta$ ) phosphorylates and regulates a wide range of  
45 substrates involved in diverse cellular functions. Some GSK3 $\beta$  substrates, such as c-myc and  
46 snail, are nuclear-resident transcription factors, suggesting possible control of GSK3 $\beta$  function  
47 by regulation of its nuclear localization. Inhibition of mechanistic target of rapamycin  
48 (mTORC1) led to partial redistribution of GSK3 $\beta$  from the cytosol to the nucleus, and GSK3 $\beta$ -  
49 dependent reduction of the expression of c-myc and snail. mTORC1 is controlled by metabolic  
50 cues, such as by AMP-activated protein kinase (AMPK) or amino acid abundance. Indeed  
51 AMPK activation or amino acid deprivation promoted GSK3 $\beta$  nuclear localization in an  
52 mTORC1-dependent manner. GSK3 $\beta$  was detected in several distinct endomembrane  
53 compartments, including lysosomes. Consistently, disruption of late endosomes/lysosomes  
54 through perturbation of Rab7 resulted in loss of GSK3 $\beta$  from lysosomes, and enhanced GSK3 $\beta$   
55 nuclear localization as well as GSK3 $\beta$ -dependent reduction of c-myc levels. This indicates that  
56 GSK3 $\beta$  nuclear localization and function is suppressed by mTORC1, and suggests a new link  
57 between metabolic conditions sensed by mTORC1 and GSK3 $\beta$ -dependent regulation of  
58 transcriptional networks controlling biomass production.

## 59 **Introduction**

60

61 Glycogen synthase kinase 3 $\beta$  (GSK3 $\beta$ ) is a serine/threonine protein kinase that controls  
62 numerous aspects of cellular physiology such as proliferation, metabolism, and apoptosis (Beurel  
63 et al., 2015; Cormier and Woodgett, 2017; Doble and Woodgett, 2003; Sutherland, 2011).  
64 Dysregulation of GSK3 $\beta$  has been linked to various diseases such as insulin resistance/diabetes,  
65 Alzheimer's disease and cancer (Jope and Johnson, 2004). GSK3 $\beta$  phosphorylates over 100  
66 substrates, more than the typical number of substrates for most kinases (Beurel et al., 2015;  
67 Linding et al., 2007; Sutherland, 2011), thus illustrating the broad capabilities for control of cell  
68 physiology by GSK3 $\beta$ . Notably, GSK3 $\beta$  is further distinguished from other kinases by being  
69 basally active (Doble and Woodgett, 2003). Hence, many mechanisms likely exist to regulate  
70 GSK3 $\beta$ .

71 GSK3 $\beta$  activity is indeed regulated by phosphorylation on S9, mediated by kinases such  
72 as Akt, protein kinase C (PKC), and p90RSK, resulting in negative regulation of GSK3 $\beta$  activity  
73 (Cross et al., 1995; Delcommenne et al., 1998; Fang et al., 2000; Stambolic and Woodgett, 1994;  
74 Sutherland et al., 1993; Tsujio et al., 2000). Phosphorylation of other sites on GSK3 $\beta$  may also  
75 suppress GSK3 $\beta$  activity, such as that of S389 by p38 MAPK (Thornton et al., 2008). In addition  
76 to GSK3 $\beta$  phosphorylation, control of GSK3 $\beta$  action may be achieved by localization of GSK3 $\beta$   
77 or some of its substrates into distinct cellular compartments, such as the nucleus, such that  
78 GSK3 $\beta$  may have limited and regulated access to certain substrates (Bechard and Dalton, 2009;  
79 Meares and Jope, 2007; Sutherland, 2011).

80 Several GSK3 $\beta$  substrates are transcription factors (Sutherland, 2011) localized largely to  
81 the nucleus, including c-myc (Gregory et al., 2003), snail (Zhou et al., 2004), C/EBP $\alpha$  and  $\beta$   
82 (Ross et al., 1999; Tang et al., 2005), and CREB (Fiol et al., 1994). C-myc controls genes  
83 important for proliferation, metabolism and biomass production, and stem-cell self renewal  
84 (reviewed by (Dang, 2012; Dang et al., 2009; Kalkat et al., 2017)). Moreover, c-myc is an  
85 oncogene altered in many cancers (Kalkat et al., 2017), highlighting the need for precise  
86 regulation of its function. C-myc protein levels are controlled by GSK3 $\beta$ -dependent  
87 phosphorylation of T58 on c-myc (Gregory et al., 2003), leading to ubiquitin-dependent  
88 proteosomal degradation (Thomas and Tansey, 2011). Control of phosphorylation and/or  
89 degradation of these nuclear substrates by GSK3 $\beta$  may involve modulation of GSK3 $\beta$  nuclear

90 localization. However, the identity of the cellular compartments in which GSK3 $\beta$  is localized,  
91 and how it moves from various cellular compartments to the nucleus is not well defined.

92 GSK3 $\beta$  localizes in part to membrane compartments in the cytoplasm. It is recruited to  
93 the plasma membrane via association with Axin (Zeng et al., 2008), impacting Wnt signaling to  
94  $\beta$ -catenin (Wu and Pan, 2010). GSK3 $\beta$  is also detected on APPL1 early endosomes (Schenck et  
95 al., 2008). APPL1 acts as an adaptor protein to recruit Akt, facilitating GSK3 $\beta$  phosphorylation  
96 and inactivation on these early endosomes, thus impacting clathrin-mediated endocytosis (Reis et  
97 al., 2015) and cell survival (Schenck et al., 2008). GSK3 $\beta$  also localizes to lysosomes (Li et al.,  
98 2016) and controls lysosomal acidification (Azoulay-Alfaguter et al., 2015). Hence, GSK3 $\beta$  may  
99 localize to multiple distinct endomembrane compartments including the plasma membrane, early  
100 endosomes and lysosomes, with distinct functions at each locale.

101 GSK3 $\beta$  exhibits nuclear localization under certain conditions including in response to  
102 apoptotic signals induced by heat shock or staurosporine treatment (Bijur and Jope, 2001), S-  
103 phase of the cell cycle (Diehl et al., 1998), replicative senescence in fibroblasts (Zmijewski and  
104 Jope, 2004), and loss of phosphatidylinositol-3-kinase (PI3K)-Akt signaling in embryonic stem  
105 cells (Bechard and Dalton, 2009). Site-directed mutagenesis studies revealed that nuclear  
106 localization of GSK3 $\beta$  requires a bipartite nuclear localization sequence (NLS) contained within  
107 residues 85-103 on GSK3 $\beta$ , and that nuclear localization was also modulated by the N-terminal 9  
108 amino acids on GSK3 $\beta$  (Meares and Jope, 2007).

109 Collectively, these observations raise the question of whether the control of GSK3 $\beta$   
110 nucleocytoplasmic shuttling could be an important mechanism to control its function by  
111 modulating access to nuclear substrates. Indeed nuclear localization of GSK3 $\beta$  induced by  
112 inhibition of PI3K or Akt leads to GSK3 $\beta$ -dependent phosphorylation of c-myc, leading to its  
113 degradation (Bechard and Dalton, 2009). However, it is not clear how PI3K-Akt signals impact  
114 GSK3 $\beta$  localization. Since this N-terminal region contains the S9 phosphorylation site, it is  
115 possible that Akt or other kinases capable of phosphorylation of this residue impact nuclear  
116 localization of GSK3 $\beta$ , although a GSK3 $\beta$  mutant (S9A) did not show obvious differences in  
117 nuclear localization (Meares and Jope, 2007).

118 While Akt may control GSK3 $\beta$  localization via direct phosphorylation of GSK3 $\beta$  on S9,  
119 this may be indirect and result from Akt-dependent activation of other signals, downstream of  
120 Akt, such as the mechanistic target of rapamycin complex 1 (mTORC1). Mitogenic activation of

121 PI3K-Akt signals leads to inhibition of the Tuberous Sclerosis Complex 1/2 (TSC 1/2) (Inoki et  
122 al., 2002), activation of the GTPase Rheb (Inoki et al., 2003), and thus mTORC1 activation  
123 (Long et al., 2005; Tee et al., 2003). mTORC1 in turn controls many processes including  
124 metabolism, protein synthesis, cell growth and autophagy (recently reviewed by (Saxton and  
125 Sabatini, 2017)). In addition to mitogenic control, mTORC1 is also strongly controlled by  
126 metabolic cues. Amino acid levels are sensed by a mechanism involving the lysosomal V-  
127 ATPase and other sensors, leading to the recruitment and activation of mTORC1 at the lysosome  
128 under conditions of amino acid sufficiency (Bar-Peled et al., 2012; Zoncu et al., 2011). Further,  
129 activation of AMP-activated protein kinase (AMPK) by energy insufficiency, resulting from an  
130 increase in the cellular levels of AMP and ADP relative to ATP, leads to phosphorylation and  
131 activation of TSC2, thus suppressing mTORC1 (Inoki et al., 2006; Shaw et al., 2004). Hence,  
132 mitogenic and metabolic signals control mTORC1 activation.

133 While it is not known if PI3K-Akt signaling regulates GSK3 $\beta$  nuclear localization *via*  
134 engagement of mTORC1, several studies have reported that GSK3 $\beta$  enhances mTORC1 activity.  
135 GSK3 $\beta$  phosphorylates the mTORC1 subunit Raptor (Stretton et al., 2015), resulting in enhanced  
136 mTORC1 activity (Azoulay-Alfaguter et al., 2015; Stretton et al., 2015). GSK3 $\beta$  also negatively  
137 regulates mTORC1 signaling by binding (Ka et al., 2014) and phosphorylation of TSC2 (Inoki et  
138 al., 2006). Moreover, GSK3 $\beta$  binds to and regulates AMPK (Suzuki et al., 2013). Hence, GSK3 $\beta$   
139 controls the mTORC1 and AMPK metabolic and mitogenic sensors. However, the possibility of  
140 a reciprocal regulation of GSK3 $\beta$  by signals from mTORC1 and AMPK, impacting GSK3 $\beta$   
141 nuclear localization and thus access to substrates therein such as c-myc, has so far been  
142 unexamined.

143 Here, we examine mTORC1 regulation of GSK3 $\beta$  nuclear localization and function. To  
144 do so, we use pharmacological and other approaches to manipulate mitogenic or metabolic  
145 signals and examine GSK3 $\beta$  localization to various endomembrane compartments and nucleus as  
146 well as GSK3 $\beta$ -dependent functions associated with nuclear GSK3 $\beta$ . We find a novel regulatory  
147 axis sensing mitogenic signals, metabolic cues and membrane traffic at the late  
148 endosome/lysosome that modulates GSK3 $\beta$  nuclear localization and function.

149 **Results**

150

151 The PI3K-Akt signaling pathway controls GSK3 $\beta$  nucleocytoplasmic shuttling and thus  
152 access of GSK3 $\beta$  to nuclear targets either directly or via activation of the downstream kinase  
153 mTORC1. mTORC1 integrates both mitogenic (PI3K-Akt) and metabolic cues, and is localized  
154 to the lysosome once activated. Using a variety of strategies to manipulate mitogenic and  
155 metabolic signals converging on mTORC1 and lysosomal membrane traffic, we examined how  
156 mTORC1 regulates GSK3 $\beta$  nuclear access and function.

157

158 *mTORC1 controls GSK3 $\beta$  nuclear localization and c-myc expression*

159

160 To determine whether mTORC1 regulates GSK3 $\beta$  localization and function downstream of  
161 PI3K/Akt, we first examined the effect of the mTORC1 inhibitor rapamycin on c-myc  
162 expression. Treatment of ARPE-19 cells (RPE henceforth) with 1  $\mu$ g/mL rapamycin caused a  
163 time-dependent decrease in c-myc expression, reaching  $57 \pm 4.8\%$  after 2 hours of rapamycin  
164 treatment (n = 6, p < 0.05, **Fig. 1A**). Importantly, co-treatment with 10  $\mu$ M of the GSK3 $\beta$  kinase  
165 inhibitor CHIR99021 blunted the decrease in c-myc expression elicited by rapamycin treatment  
166 (**Fig. 1A**). Consistent with this result, rapamycin treatment also elicited a reduction in expression  
167 of the transcription factor snail, an effect also blunted by co-treatment with CHIR 99021 (**Fig.**  
168 **1B**).

169 We next used siRNA gene silencing of GSK3 $\beta$ , which resulted in a  $91 \pm 4.7\%$  reduction of  
170 GSK3 $\beta$  protein levels (n = 3, p < 0.05, **Fig. S1A**). While RPE cells also express the paralog  
171 GSK3 $\alpha$ , silencing of GSK3 $\beta$  was specific and did not impact expression of GSK3 $\alpha$  (**Fig. S1B**).  
172 Cells subjected to silencing of GSK3 $\beta$  exhibited no change in c-myc upon inhibition of  
173 sequential signals in the PI3K-Akt-mTORC1 axis, achieved by treatment with either LY294002,  
174 Akti-1/2, or rapamycin, respectively (**Fig. 1C**). In contrast, each inhibitor effectively reduced c-  
175 myc expression in cells subjected to non-targeting (control) siRNA treatment (**Fig. 1C**). Taken  
176 together, these results indicate that PI3K-Akt signals converge on mTORC1 to enhance c-myc  
177 levels in a manner that requires the regulation of GSK3 $\beta$ .

178 To determine how PI3K-Akt-mTORC1 signals control c-myc expression in a GSK3 $\beta$ -  
179 dependent manner, we examined the localization and levels of endogenous GSK3 $\beta$  and c-myc.

180 Consistent with a previous report (Bechard and Dalton, 2009), in cells grown in serum with an  
181 active PI3K-Akt-mTORC1 axis, GSK3 $\beta$  primarily localizes within the cytosol and appears  
182 mostly excluded from the nucleus (**Fig. 2A**). We confirmed the specificity of detection of  
183 endogenous GSK3 $\beta$  by immunofluorescence microscopy following GSK3 $\beta$  silencing (**Fig. S1C**).  
184 In contrast, and as expected (Abrams et al., 1982; Hann et al., 1983; Smith et al., 2004), c-myc  
185 localizes virtually entirely within the nucleus under these conditions (**Fig. 2A**). Thus, under  
186 conditions in which mTORC1 is active, GSK3 $\beta$  and c-myc are compartmentalized separately  
187 within the cytosol and nucleus, respectively.

188 We next determined how PI3K-Akt-mTORC1 signaling regulates GSK3 $\beta$  localization.  
189 Treatment of RPE cells with either LY294002, Akti-1/2, or rapamycin to perturb PI3K, Akt or  
190 mTORC1, respectively resulted in robust and significant ( $n = 3$ ,  $p < 0.05$ ) increase in nuclear  
191 GSK3 $\beta$ , measured by the ratio of nuclear to cytosolic mean fluorescence intensities of GSK3 $\beta$   
192 which we term the GSK3 $\beta$  nuclear localization index (**Fig. 2B**). Importantly, the effect of  
193 rapamycin treatment on GSK3 $\beta$  nuclear translocation and snail protein levels was also observed  
194 in MDA-MB-231 breast cancer cells (**Fig. S1D-E**), demonstrating that the mTORC1-dependent  
195 control of GSK3 $\beta$  is not unique to RPE cells. Furthermore, inhibition of the PI3K-Akt-mTORC1  
196 axis also resulted in robust nuclear localization of GSK3 $\alpha$  (**Fig. S1E**), a paralog of GSK3 $\beta$  with  
197 highly similar kinase domains but unique terminal motifs (Cormier and Woodgett, 2017;  
198 Woodgett, 1990). These results indicate that PI3K-Akt signals act via control of mTORC1 to  
199 regulate GSK3 $\beta$  nuclear localization, as well as that of GSK3 $\alpha$ .

200 To test the importance of Ran in mTORC1-dependent GSK3 $\beta$  nuclear translocation, we  
201 examined the impact of Ran GTP-binding mutants on GSK3 $\beta$  localization. We expressed wild-  
202 type (WT) Ran or one of two Ran mutants, Ran T24N and G19V, which are constitutively GDP-  
203 or GTP-bound, respectively (Carey et al., 1996). Cells expressing WT Ran exhibited little  
204 nuclear GSK3 $\beta$  in the control condition, but a robust localization of GSK3 $\beta$  in the nucleus was  
205 observed upon treatment with rapamycin (**Fig. 3**, upper panels, and quantification, lower panel).  
206 In contrast, cells expressing Ran T24N exhibited nuclear GSK3 $\beta$  in both control and rapamycin-  
207 treated conditions (**Fig. 3**), consistent with Ran-GDP acting to facilitate nuclear import (Carey et  
208 al., 1996). Further, cells expressing Ran G19V exhibited mostly cytosolic GSK3 $\beta$  in both control  
209 and rapamycin-treated conditions, consistent with this mutant blocking Ran-dependent nuclear

210 import (**Fig. 3**). These results indicate that GSK3 $\beta$  undergoes Ran-dependent nucleocytoplasmic  
211 shuttling and Ran-dependent nuclear import that is regulated by mTORC1.

212

### 213 *Metabolic cues regulate GSK3 $\beta$ nuclear localization via mTORC1*

214

215 As mTORC1 is regulated by both mitogenic (PI3K-Akt) signals as well as metabolic cues,  
216 we next examined how each of these signals contributes to the control of GSK3 $\beta$  nuclear  
217 localization. AMPK is activated via ATP insufficiency, and negatively regulates mTORC1  
218 signaling through phosphorylation and activation of TSC2 (Inoki et al., 2006; Shaw et al., 2004).  
219 Consistent with the effects of mTORC1 inhibition by rapamycin, treatment with the AMPK  
220 activator A769662 resulted in robust GSK3 $\beta$  nuclear localization (**Fig. 4A**). Importantly, AMPK  
221 and mTORC1 exhibit reciprocal negative regulation (Inoki et al., 2012). As such, GSK3 $\beta$  nuclear  
222 localization could conceivably be the direct result of loss of mTORC1 signals, or an increase in  
223 AMPK activation, both of which would be expected to occur upon treatment with either  
224 rapamycin or A769662. To dissect a role for mTORC1 versus AMPK in control of GSK3 $\beta$   
225 nuclear localization, we used the AMPK inhibitor compound C (Ross et al., 2015). Cells treated  
226 with compound C exhibited a rapamycin-dependent increase in GSK3 $\beta$  nuclear localization  
227 comparable to that observed in cells treated with rapamycin but not compound C (**Fig. 4A**). This  
228 indicates that AMPK activity is dispensable for GSK3 $\beta$  nuclear localization induced by  
229 mTORC1 inhibition. As GSK3 $\beta$  forms a complex with AMPK (Suzuki et al., 2013), we also  
230 tested whether AMPK may have a kinase-independent, structural role in regulation of GSK3 $\beta$ .  
231 However, silencing of AMPK did not impact GSK3 $\beta$  nuclear localization (**Fig. S2**). Collectively,  
232 these results indicate that while AMPK activation also triggers an accumulation of nuclear  
233 GSK3 $\beta$ , this occurs as a result of AMPK-dependent inhibition of mTORC1 signals, and not as a  
234 result of direct action of AMPK on GSK3 $\beta$  nuclear localization.

235 mTORC1 is activated by abundance of amino acids in a manner that requires the V-ATPase  
236 (Zoncu et al., 2011). To determine how amino acid-dependent activation of mTORC1 impacted  
237 control of GSK3 $\beta$  localization, we treated cells with the V-ATPase inhibitor Concanamycin A.  
238 Cells treated with Concanamycin A exhibited a significant enhancement of nuclear GSK3 $\beta$   
239 relative to control (**Fig. 4B**). Consistent with this result, amino acid deprivation achieved via  
240 treatment of cells in amino acid depleted media (EBSS) also mimicked the effect of rapamycin



241 treatment in RPE (**Fig. 4C**) as well as MDA-MB-231 (**Fig. S1C**) cells. These results indicate that  
242 amino acid sensing by mTORC1 contributes to the regulation of GSK3 $\beta$  nuclear localization.

243 mTORC1 inhibition also leads to induction of autophagy (Jung et al., 2009). We therefore  
244 tested whether autophagy is required for GSK3 $\beta$  nuclear localization upon mTORC1 inhibition  
245 with rapamycin. To inhibit autophagy induction, we treated cells siRNA targeting endogenous  
246 ULK (Saric et al., 2016), which resulted in a robust  $77\% \pm 6.2$  reduction of ULK expression ( $n =$   
247  $3$ ,  $p < 0.05$ , **Fig. S3A**). Cells treated with siRNA to silence ULK1 exhibited cytosolic GSK3 $\beta$ ,  
248 which relocalized to the nucleus upon rapamycin treatment in a manner indistinguishable from  
249 cells treated with non-targeting siRNA (**Fig. S3B**). As autophagy induction has also been  
250 reported to lead to c-myc degradation (Cianfanelli et al., 2014), we also tested the effect of  
251 ULK1 silencing on rapamycin-induced c-myc expression. Surprisingly, silencing of ULK1 on its  
252 own reduced c-myc expression (**Fig. 3C**). Moreover, and in contrast to the findings of a previous  
253 study (Cianfanelli et al., 2014), impairment of autophagy induction by ULK1 silencing did not  
254 prevent the rapamycin-induced reduction in c-myc expression (**Fig. S3C**). Thus, GSK3 $\beta$  nuclear  
255 translocation and c-myc degradation observed upon mTORC1 inhibition are largely independent  
256 of autophagy induction. Instead, c-myc degradation upon mTORC1 inhibition is mediated by  
257 regulation of GSK3 $\beta$  nuclear localization and function.

258

### 259 *Control of GSK3 $\beta$ nuclear localization does not require GSK3 $\beta$ S9 phosphorylation*

260

261 Akt phosphorylates GSK3 $\beta$  on S9, which negatively regulates GSK3 $\beta$  kinase activity  
262 towards certain substrates. We next examined how GSK3 $\beta$  phosphorylation may contribute to  
263 control of GSK3 $\beta$  nuclear localization by mTORC1. As expected, cells treated with LY294002  
264 or Akti-1/2 exhibited significant reductions in GSK3 $\beta$  S9 phosphorylation by  $80 \pm 0.8\%$  and  $60$   
265  $\pm 6.8\%$  respectively ( $n = 3$ ,  $p < 0.05$ , **Fig. 5A**). In contrast, cells treated with rapamycin exhibited  
266 no change in GSK3 $\beta$  S9 phosphorylation compared to control (**Fig. 5A**). These results uncouple  
267 S9 phosphorylation from control of GSK3 $\beta$  nuclear localization. To directly probe the  
268 contribution of GSK3 $\beta$  S9 phosphorylation to mTORC1-dependent GSK3 $\beta$  nuclear localization,  
269 we studied the subcellular localization of GSK3 $\beta$  S9A. Under basal conditions, GSK3 $\beta$  S9A  
270 remains cytosolic, while treatment with the Akt inhibitor Akti-1/2 resulted in nuclear localization  
271 of GSK3 $\beta$  S9A, as seen with GSK3 $\beta$  WT (**Fig. 5B**).

272 Using phos-tag acrylamide electrophoresis, a technique that exaggerates differences in  
273 apparent molecular weight of phosphorylated species of a protein (Kinoshita et al., 2006), we  
274 observed two detectable species of GSK3 $\beta$ , of which the higher molecular weight species likely  
275 corresponds to the S9 phosphorylated form given its sensitivity to PI3K and Akt inhibition (**Fig.**  
276 **S4A**). In contrast and as expected, rapamycin had no effect on GSK3 $\beta$  detected by this method.  
277 Collectively, these results indicate that regulation of GSK3 $\beta$  S9 phosphorylation does not  
278 contribute to control of GSK3 $\beta$  nuclear localization by PI3K-Akt-mTORC1 signals.

279

### 280 *GSK3 $\beta$ is localized to several distinct membrane compartments within the cytoplasm*

281

282 Active mTORC1 is recruited to the surface of the lysosome (Sancak et al., 2008). Together  
283 with our observations that mTORC1 controls GSK3 $\beta$  nuclear localization, this suggests that (i)  
284 mTORC1 control of GSK3 $\beta$  may occur at lysosomes and (ii) control of GSK3 $\beta$  nuclear  
285 localization by mTORC1 may require lysosomal membrane traffic. To determine if a pool of  
286 GSK3 $\beta$  is indeed localized to lysosomes concomitantly to GSK3 $\beta$  recruitment to other  
287 endomembrane compartments, we systematically examined the localization of endogenous  
288 GSK3 $\beta$  relative to APPL1 and EEA1 early endosomes, and to lysosomes demarked by LAMP1.  
289 We observed punctate distribution of endogenous GSK3 $\beta$  within the cytoplasm, with some  
290 visible overlap with each of APPL1, EEA1 and LAMP1 (**Fig. 6A-C**, left panels). To determine if  
291 the overlap observed between GSK3 $\beta$  and each marker was specific, we used quantification by  
292 Manders' coefficient to compare overlap between real pairs of image channels, as well as  
293 between pairs of images with scrambled channel spatial position. This revealed specific GSK3 $\beta$   
294 recruitment to each membrane compartment (**Fig. 6A-C**). We performed a similar colocalization  
295 analysis of the image data using Pearson's coefficient and obtained similar results (**Fig. S4B**).  
296 This indicates that GSK3 $\beta$  indeed exhibits partial yet specific localization to several distinct  
297 endomembrane compartments, including APPL1 and EEA1 early endosomes, and late  
298 endosomes/lysosomes demarked by LAMP1.

299 To further examine how GSK3 $\beta$  may localize to lysosomes, we employed structured  
300 illumination microscopy (SIM). Using this method, we were able to resolve the limiting  
301 membrane of lysosomes demarked by LAMP1 fluorescence staining (**Fig. 6D**). Importantly,  
302 GSK3 $\beta$  fluorescence staining was readily observed in punctate structures, in part associated with

303 the limiting membrane of the lysosome. These results indicate that a subset of GSK3 $\beta$  in the  
304 cytoplasm exhibits association with the lysosome, either restricted to sub-domains of the  
305 lysosomal surface (Kaushik et al., 2006) or in structures associated with the lysosome, such as  
306 within membrane contact sites (Chu et al., 2015).

307

308 *Control of GSK3 $\beta$  nuclear localization and c-myc expression requires normal lysosomal*  
309 *membrane traffic*

310

311 Given the localization mTORC1 (Sancak et al., 2008) and partial localization of GSK3 $\beta$   
312 (**Fig. 6C-D**) to or near the lysosome, we next sought to determine the role of late  
313 endosome/lysosome membrane traffic to mTORC1-dependent control of GSK3 $\beta$  nuclear  
314 localization. To do so, we used a Rab7 mutant that is constitutively GDP-bound (T22N), which  
315 disrupts membrane traffic at the late endosome/lysosome (Choudhury et al., 2002). Cells  
316 expressing Rab7 T22N exhibited a significant increase in nuclear GSK3 $\beta$ , even in the absence of  
317 rapamycin treatment, compared to cells expressing Rab7 WT (**Fig. 7A**). Furthermore, cells  
318 expressing Rab7 T22N exhibited a depletion of GSK3 $\beta$  from lysosomes, observed by overlap of  
319 endogenous GSK3 $\beta$  and LAMP1, quantified by Manders' coefficient (**Fig. S4C**). In contrast to  
320 the nuclear accumulation of GSK3 $\beta$  in cells expressing Rab7 T22N, silencing of APPL1 to  
321 disrupt early endosome membrane traffic did not impact GSK3 $\beta$  nuclear localization (**Fig. S4D**).  
322 These results indicate that membrane traffic at the late endosome/lysosome may be important to  
323 organize mTORC1 signals leading to control of GSK3 $\beta$  nuclear localization.

324 In order to determine the consequence of Rab7-dependent control of GSK3 $\beta$  nuclear  
325 localization, we examined the effect of expression of Rab7 T22N on GSK3 $\beta$ -dependent c-myc  
326 expression levels. Cells expressing Rab7 T22N exhibited a stark reduction in c-myc expression  
327 relative to cells expressing Rab7 WT (**Fig. 7B**). Importantly, treatment of cells expressing Rab7  
328 T22N with the GSK3 $\beta$  inhibitor CHIR 99021 restored c-myc expression levels to that observed  
329 in cells expressing Rab7 WT (**Fig. 7B**). Taken together, these results indicate that control of  
330 GSK3 $\beta$  nuclear localization requires Rab7-dependent late endosome/lysosomal membrane  
331 traffic, reflecting perhaps the role of lysosomes as platform for mTORC1 signaling required to  
332 negatively regulate GSK3 $\beta$  nuclear translocation.

333 **Discussion**

334

335 We identified that the nuclear localization of GSK3 $\beta$  is regulated by mTORC1, such that  
336 conditions that reduce mTORC1 activity result in increased nuclear localization of GSK3 $\beta$ , and  
337 increased GSK3 $\beta$ -dependent degradation of nuclear substrates such as c-myc and snail.  
338 Furthermore, GSK3 $\beta$  was partly but specifically localized to the surface of late  
339 endosomes/lysosomes, and perturbation of membrane traffic at the late endosomes/lysosomes  
340 disrupted GSK3 $\beta$  nucleocytoplasmic shuttling and regulation of c-myc expression.

341

342 ***Localization of GSK3 $\beta$  within multiple membrane compartments within the cytoplasm***

343

344 Separate studies have reported that GSK3 $\beta$  may localize to a number of distinct cellular  
345 compartments, including endomembranes, mitochondria and the nucleus (reviewed by (Beurel et  
346 al., 2015)). By a systematic, unbiased approach, we find that endogenous GSK3 $\beta$  localizes to  
347 several distinct endomembrane compartments, including APPL1 endosomes, EEA1-positive  
348 early endosomes and LAMP1-positive late endosomes/lysosomes (**Fig. 6**). In each case, the  
349 overlap of GSK3 $\beta$  immunofluorescence signal and that of each compartment marker is clearly  
350 limited and partial, with substantial proportions of each signal not exhibiting overlap (**Fig. 6A-**  
351 **C**). However, systematic and unbiased analysis of colocalization performed by Manders' (**Fig.**  
352 **6A-C**) or Pearson's (**Fig. S4B**) coefficient analysis indicates that GSK3 $\beta$  overlap with each  
353 compartment is specific and non-random. Moreover, the specific recruitment of GSK3 $\beta$  to the  
354 limiting membrane of LAMP1-positive late endosomes/lysosomes is supported by images  
355 obtained by SIM (**Fig. 6D**), as well as by the observation that perturbation of late  
356 endosome/lysosome membrane traffic by expression of a dominant interfering mutant of Rab7  
357 abolishes the overlap of GSK3 $\beta$  with LAMP1 signals (**Fig. S4C**). Our observations are thus  
358 consistent with the notion that GSK3 $\beta$  is localized to a number of distinct cellular compartments,  
359 with a minor pool that in some cases is <10% of total cellular GSK3 $\beta$ , recruited to each such  
360 compartment at steady state.

361 Our observations are also consistent with previous studies showing GSK3 $\beta$  localization  
362 to APPL1 endosomes (Schenck et al., 2008). APPL1 recruitment to a subset of internalized  
363 membranes formed by clathrin-mediated endocytosis precedes the acquisition of markers of the

364 EEA1 early endosome (Zoncu et al., 2009). This pool of GSK3 $\beta$  within APPL1 endosomes may  
365 be specifically targeted by phosphorylation on S9 by Akt, as silencing of APPL1 abolishes Akt-  
366 dependent GSK3 $\beta$  phosphorylation (Reis et al., 2015; Schenck et al., 2008). Notably,  
367 perturbation of APPL1 by silencing did not impact mTORC1-dependent control of GSK3 $\beta$   
368 nuclear localization (**Fig. S4D**), suggesting that the APPL1-localized pool of GSK3 $\beta$  does not  
369 directly participate in the regulation of GSK3 $\beta$  nuclear localization by mTORC1.

370 As mTORC1 localizes to the surface of late endosomes and lysosomes, the pool of  
371 GSK3 $\beta$  on these membranes may be under the direct regulation by mTORC1 to control GSK3 $\beta$   
372 nucleocytoplasmic shuttling. Indeed a previous report had observed some overlap of GSK3 $\beta$  and  
373 the lysosome (Li et al., 2016). However, GSK3 $\beta$  may also be sequestered within intraluminal  
374 vesicles of multivesicular bodies in response to Wnt signaling (Taelman et al., 2010), raising the  
375 possibility that the overlap that we observed by spinning disc confocal microscopy between  
376 LAMP1-positive structures and GSK3 $\beta$  (**Fig. 6C**) could reflect GSK3 $\beta$  within intraluminal  
377 vesicles. However, examination of SIM images suggests that very little, if any, GSK3 $\beta$  is  
378 observed within the lumen of LAMP1-positive structures (**Fig. 6D**), suggesting that LAMP1-  
379 localized GSK3 $\beta$  is largely associated with the limiting membrane of these compartments.  
380 Moreover, perturbation of Rab7 disrupts the localization of GSK3 $\beta$  and LAMP1 (**Fig. S4C**), yet  
381 Rab7 disruption does not impact the sequestration of material into intraluminal vesicles  
382 (Vanlandingham and Ceresa, 2009). The molecular mechanism(s) by which GSK3 $\beta$  is recruited  
383 to lysosomes remains unknown, and is beyond the scope of this study. Our results thus add  
384 systematic analysis and quantification to indicate that a pool of GSK3 $\beta$  is present on the limiting  
385 membrane of the lysosome, and suggesting that this pool may be subject to regulation by  
386 mTORC1, resulting in control of GSK3 $\beta$  nuclear localization.

387

### 388 *Mechanism of control of GSK3 $\beta$ nuclear localization by mTORC1*

389

390 We found that direct inhibition of any component of the PI3K-Akt-mTORC1 axis, or  
391 activation of AMPK to trigger mTORC1 inhibition results in an increase in GSK3 $\beta$  nuclear  
392 localization. Moreover, perturbation of Rab7-dependent membrane traffic also resulted in an  
393 increase in GSK3 $\beta$  nuclear localization, suggesting that in addition to mTORC1 signals,  
394 lysosomal traffic and/or organization is also required to control GSK3 $\beta$  nuclear import.

395 Interestingly, we also observed that inhibition of PI3K-Akt-mTORC1 also increased nuclear  
396 localization of GSK3 $\alpha$ . Hence, it is likely that mTORC1 signals similarly gate GSK3 $\alpha$  and  
397 GSK3 $\beta$  nuclear localization. Taken together, we propose that mTORC1 establishes a form of  
398 ‘molecular licencing’ for retention within the cytoplasm for GSK3 $\alpha$  and GSK3 $\beta$ , resulting in  
399 nuclear exclusion under conditions of elevated mTORC1 activity. This molecular licencing could  
400 take the form of a post-translational modification of GSK3 $\alpha$  or GSK3 $\beta$ , or of regulation of  
401 protein complex formation at specific subcellular locale(s).

402 GSK3 $\beta$  undergoes nucleocytoplasmic shuttling, due to nuclear import in balance with  
403 FRAT-1-mediated nuclear export (Wiechens and Fagotto, 2001). Nuclear import of some (but  
404 not all) proteins is controlled by a gradient of GTP-bound and GDP-bound Ran that spans the  
405 nuclear membrane (Strambio-De-Castillia et al., 2010). By expression of mutants of Ran (**Fig.**  
406 **3**), we show that the nucleocytoplasmic shuttling of GSK3 $\beta$  is Ran-dependent. Nuclear import of  
407 GSK3 $\beta$  resulting from mTORC1 inhibition by rapamycin was prevented in cells expressing Ran  
408 G19V mutant defective in GTP hydrolysis and thus defective in nuclear import. Hence, nuclear  
409 import of GSK3 $\beta$  regulated by mTORC1 is Ran-dependent.

410 We examined whether the phosphorylation of S9 on GSK3 $\beta$  could control its mTORC1-  
411 regulated nuclear localization; however, two observations strongly suggest that this is not the  
412 case: (i) inhibition of mTORC1 by rapamycin did not alter S9 phosphorylation of GSK3 $\beta$  (**Fig.**  
413 **5A**), and (ii) a mutant of GSK3 $\beta$  that cannot be phosphorylated at this position (S9A) behaved  
414 similarly to wild-type with respect to mTORC1-dependent nuclear localization (**Fig. 5B**).  
415 GSK3 $\beta$  can also be phosphorylated on a number of other residues, including Y216, which may  
416 result from auto-phosphorylation at the time of GSK3 $\beta$  synthesis (Beurel et al., 2015). Further,  
417 GSK3 $\beta$  can be phosphorylated at T43 (Ding et al., 2005) and S389 (Thornton et al., 2008) by Erk  
418 and p38 MAPK, respectively, each of which lead to reduction in GSK3 $\beta$  activity. Notably, using  
419 a phos-tag gel electrophoresis approach, a technique that exacerbates the apparent molecular  
420 weight increase caused by phosphorylation, we were only able to resolve two bands for GSK3 $\beta$   
421 that likely correspond to S9 phosphorylated and non-S9 phosphorylated forms (**Fig. S4A**). It will  
422 be interesting to determine in future studies if and how phosphorylation at sites other than S9 are  
423 regulated by mTORC1 to control GSK3 $\beta$  nuclear localization.

424 Other than phosphorylation, other modifications reported for GSK3 $\beta$  include  
425 citrullination (Stadler et al., 2013) ADP-ribosylation (Feijs et al., 2013) and calpain cleavage

426 (Goñi-Oliver et al., 2007). Indeed, citrullination of R3 and R5 residues within GSK3 $\beta$  is  
427 important for nuclear localization (Stadler et al., 2013). However, we observed that mTORC1  
428 controls both GSK3 $\alpha$  and GSK3 $\beta$  nuclear localization, and these two GSK3 paralogs differ at  
429 their N-terminus within the region of GSK3 $\beta$  that undergoes citrullination. Hence, it appears  
430 unlikely to expect that mTORC1 controls citrullination of GSK3 $\beta$  as a mechanism of control of  
431 its nucleocytoplasmic shuttling. While beyond the scope of this study, it will be interesting to  
432 note how future work may resolve whether mTORC1-dependent regulation of post-translational  
433 modification of GSK3 $\beta$  underlies the regulation of its nuclear localization by mTORC1.

434 mTORC1-dependent control of GSK3 $\beta$  nuclear localization may occur as a result of  
435 regulation of GSK3 $\beta$  interaction with other proteins in various endomembrane compartments. It  
436 is worth noting that the vast majority of cytoplasmic, but not nuclear GSK3 $\beta$ , is associated with  
437 other protein(s) (Meares and Jope, 2007). Thus, it is possible that control of GSK3 $\beta$   
438 nucleocytoplasmic shuttling involves regulation of protein-protein interactions that serve to  
439 occlude the bipartite NLS of GSK3 $\beta$  (residues 85 to 103) (Meares and Jope, 2007), thus limiting  
440 GSK3 $\beta$  nuclear localization when these interactions are present.

441 We also found that Rab7 is required to retain GSK3 $\beta$  in the cytoplasm under conditions  
442 when mTORC1 is otherwise active. Importantly, disruption of late endosome/lysosome  
443 membrane traffic by perturbations of Rab7 or other proteins does not impact mTORC1 activity  
444 (Flinn et al., 2010). This indicates that the ability of mTORC1 to limit the nuclear localization of  
445 GSK3 $\beta$  requires active traffic to the late endosome/lysosome. This in turn suggests that the  
446 protein interactions engaged by GSK3 $\beta$  that occlude its NLS and thus limit nuclear localization  
447 may occur on the lysosome, consistent with our observed localization of GSK3 $\beta$  to the lysosome.  
448 Indeed GSK3 $\alpha$  and GSK3 $\beta$  have nearly identical kinase domains (in which the NLS is found),  
449 consistent with the ability of mTORC1 to gate nuclear access for both GSK3 paralogs.

450 Furthermore, our observations that mTORC1 controls GSK3 $\beta$  nuclear localization add to  
451 previous reports that GSK3 $\beta$  activates mTORC1 signals (Inoki et al., 2006), and suggests the  
452 existence of reciprocal regulation of mTORC1 and GSK3 $\beta$ . Overall, we propose that mTORC1  
453 signals limit the ability of GSK3 $\beta$  to localize to the nucleus, and that this may result from  
454 mTORC1-dependent control of GSK3 $\beta$  interactions with other proteins in a manner that  
455 regulates occlusion of the NLS of GSK3 $\beta$  at the lysosome.

456

## 457 *Regulation of GSK3 $\beta$ nuclear functions by mTORC1*

458

459 We identified that various metabolic and mitogenic signals gate nuclear access for  
460 GSK3 $\beta$ . This in turn allows for GSK3 $\beta$ -dependent regulation of nuclear substrates in response to  
461 mTORC1 signals. Previous studies reported that nuclear and cytoplasmic pools of GSK3 $\beta$  have  
462 distinct functions, such as nuclear GSK3 $\beta$  facilitating stem cell differentiation over self-renewal  
463 (Bechard and Dalton, 2009) or the cytosolic pool of GSK3 $\beta$  being sufficient to mediate GSK3 $\beta$ -  
464 dependent cell survival to tumor necrosis factor  $\alpha$  (TNF $\alpha$ ) apoptotic signals (Meares and Jope,  
465 2007).

466 One of the nuclear substrates of GSK3 $\beta$  is c-myc, a helix-loop-helix-leucine zipper  
467 transcription factor that has a very short half-life (15-30 mins) (Kalkat et al., 2017; Lüscher and  
468 Eisenman, 1988). As previously reported, nuclear localization of GSK3 $\beta$  is required for  
469 phosphorylation of GSK3 $\beta$  on T58, resulting in enhanced c-myc degradation (Gregory et al.,  
470 2003). We show that rapamycin treatment, which promotes nuclear localization of GSK3 $\beta$ , also  
471 results in an acute reduction in c-myc accumulation (**Fig. 1**), most likely due to c-myc  
472 degradation. A previous report suggested that rapamycin treatment elicits degradation of c-myc  
473 by induction of autophagy, as result of induction of AMBRA-dependent dephosphorylation of c-  
474 myc at T58 (Cianfanelli et al., 2014). However, we show that the degradation of c-myc induced  
475 by rapamycin is insensitive to impairment of autophagy induction elicited by siRNA gene  
476 silencing of ULK1 (**Fig. S3**). Moreover, we find that the rapamycin-induced reduction in c-myc  
477 levels is countered by perturbation of GSK3 $\beta$  (**Fig. 1A-B**). Hence, our results indicate that  
478 mTORC1-dependent control of GSK3 $\beta$  nuclear localization regulates c-myc in a manner that  
479 does not require induction of autophagy.

480 Based on the control of GSK3 $\beta$  nuclear localization by mTORC1 leading to control of c-  
481 myc, we propose the existence of a metabolic sensing signaling network that links nutrient  
482 availability with biomass production and proliferation. Indeed, c-myc controls the expression of  
483 many genes, generally to promote ribosome production, biomass accumulation and enhanced  
484 cellular bioenergetics, such as through mitochondrial biosynthesis (Miller et al., 2012).  
485 Furthermore, c-myc promotes epithelial-mesenchymal transition (Cho et al., 2010). Hence,  
486 signals activated during nutrient deficiency can impair the anabolic c-myc-dependent promotion



487 of biomass accumulation via this novel mTORC1-GSK3 $\beta$ -c-myc signaling axis involving control  
488 of GSK3 $\beta$  nuclear localization.

489 GSK3 $\beta$  may also regulate other nuclear substrates selectively during conditions of  
490 reduced mTORC1 signaling or other states in which GSK3 $\beta$  exhibits nuclear localization.  
491 Collectively, regulation of other GSK3 $\beta$  substrates such as snail (leading to degradation, (Sekiya  
492 and Suzuki, 2011)) or c-jun (leading to impaired DNA binding, (Nikolakaki et al., 1993)) is  
493 consistent with the effect of GSK3 $\beta$ -dependent degradation of c-myc: reduced cell cycle  
494 progression, impairment of epithelial-mesenchymal transition and/or reduced biomass  
495 accumulation. While examination of mTORC1-dependent regulation of all known GSK3 $\beta$   
496 nuclear targets is beyond the scope of this study, it is perhaps tempting to speculate that  
497 metabolic and mitogenic signals broadly control the nuclear profile of GSK3 $\beta$  functions,  
498 coordinating energy-demanding accumulation of biomass, cell cycle progression and growth  
499 with nutrient availability. As cancer cells exhibit heterogeneity of metabolic cues and signals, it  
500 is possible that differences in metabolism between cancer cells that result in distinct GSK3 $\beta$   
501 nuclear localization profiles may underlie in part the differences in response to drugs targeting  
502 GSK3 $\beta$  in cancer, although this remains to be examined.

503  
504 In conclusion, we identified that GSK3 $\beta$  nucleocytoplasmic shuttling is controlled by  
505 both mitogenic signals such as PI3K-Akt and metabolic cues including amino acid or ATP  
506 availability as a result of mTORC1-dependent control of GSK3 $\beta$  nuclear import. In addition,  
507 GSK3 $\beta$  localized in part to the late endosome/lysosome and nuclear localization of GSK3 $\beta$  was  
508 regulated by Rab7, suggesting that membrane traffic at late endosomes and lysosomes impacts  
509 signals leading to control of GSK3 $\beta$  nuclear localization. Lastly, we propose that GSK3 $\beta$ -  
510 dependent control of nuclear proteins by mTORC1 occurs by regulation of GSK3 $\beta$  nuclear  
511 import, linking nutrient availability to control of energy-dependent transcriptional networks.

## 512 **Materials and Methods**

513

### 514 ***Materials***

515

516 Antibodies targeting specific proteins were obtained as follows: GSK3 $\beta$ , phospho-  
517 GSK3 $\beta$  (S9) actin, HA-epitope, EEA1, LAMP1, APPL1, and ULK1 (Cell Signaling, Danvers,  
518 MA), and clathrin (Santa Cruz Biotechnology, Dallas, TX). Horseradish peroxidase or  
519 fluorescently-conjugated conjugated secondary antibodies were purchased from Cell Signaling  
520 Technology (Danvers, MA). DAPI Nuclear staining was purchased from ThermoFisher  
521 (Rockford, IL).

522 Ran cDNA constructs tagged to HA, including WT, T24N and G19V forms in pKH3  
523 were generously provided by Dr. Ian Macara (Vanderbilt University School of Medicine,  
524 Nashville, TN) (Carey et al., 1996). GSK3 $\beta$  cDNA constructs, including HA-tagged WT and  
525 S9A forms in pcDNA3 were generously provided by Dr. Jim Woodgett (Lunenfeld-Tanenbaum  
526 Research Institute/Mount Sinai Hospital, Toronto, ON) (Stambolic and Woodgett, 1994). Rab7  
527 constructs, including WT and T22N, were generously provided by Dr. Richard Pagano (Mayo  
528 Clinic and Foundation, Rochester, MN) (Choudhury et al., 2002).

529

### 530 ***Cell lines, cell culture and inhibitor treatment***

531

532 Wild-type human retinal pigment epithelial cells (ARPE-19; RPE herein) were cultured  
533 were obtained from American Type Culture Collection (ATCC, Manassas, VA) as previously  
534 described (Delos Santos et al., 2017) with DMEM/F12 (Gibco, ThermoFisher Scientific,  
535 Waltham, MA) containing 10 % fetal bovine serum, 100 U/ml penicillin and 100  $\mu$ g/ml  
536 streptomycin. Cells were then incubated at 37 C and 5 % CO<sub>2</sub>. MDA-MB-231 cells were  
537 obtained from ATCC and cultured as previously described (Fekri et al., 2016) with RPMI media  
538 1640 (Gibco) containing 10 % fetal bovine serum, 100 U/ml penicillin and 100  $\mu$ g/ml  
539 streptomycin and incubated at 37C and 5 % CO<sub>2</sub>.

540 All inhibitor treatments were performed (alone or in combination) for 1 h prior to  
541 experimental assays unless otherwise indicated, as follows: 10  $\mu$ M CHIR 99021 (Abcam,  
542 Cambridge, MA), 1  $\mu$ M Rapamycin (BioShop, Burlington, ON), 10  $\mu$ M LY294002 (Cell

543 Signaling Technologies), 5  $\mu$ M Akti-1/2 (Sigma-Aldrich, Oakville, Canada), 1  $\mu$ M  
544 Concanamycin A (BioShop). Amino acid starvation was performed by incubation in Earle's  
545 Balanced Salt Solution (EBSS, Gibco).

546

#### 547 *Plasmid and siRNA transfections*

548

549 To perform DNA plasmid transfections, Lipofectamine 2000 (ThermoFisher Scientific)  
550 was used according to the manufacturers instructions and as previous described (Bone et al.,  
551 2017). Briefly, cells were incubated for 4 h with Lipofectamine 2000 reagent and appropriate  
552 plasmid in Opti-MEM (Gibco) at a 3:1 ratio. Subsequently, this transfection solution was  
553 removed, and cells were incubated in fresh cell growth medium at 37C and 5% CO<sub>2</sub> for 16-24 h  
554 prior to experimentation.

555 To perform siRNA transfections as previously described (Bone et al., 2017), custom-  
556 synthesized siRNAs targeting specific transcripts with sequences as follows were obtained from  
557 Dharmacon (Lafayette, CO) as follows: non-targeting control: CGU ACU GCU UGC GAU  
558 ACG GUU (sense strand), and CGT ACT GCT TGC GAT ACG GUU (antisense strand);  
559 GSK3 $\beta$ : ACA CUA UAG UCG AGC CAA AUU (sense strand), and UUU GGC UCG ACU  
560 AUA GUG U (antisense strand); ULK1: GCA CAG AGA CCG UGG GCA AUU (sense strand),  
561 and UUG CCC ACG GUC UCU GUG CUU (antisense strand); APPL1: CAG AAU GUU CGC  
562 AGG GAA AUU (sense strand), and UUU CCC UGC GAA CAU UCU GUU (antisense strand).  
563 Cells were incubated with 220 pmol/L of each siRNA sequence with Lipofectamine RNAiMAX  
564 (LifeTechnologies) in Opti-MEM medium (Gibco) for 4 hours at 37C and 5% CO<sub>2</sub>. After this  
565 incubation period, cells were washed and incubated in fresh cell growth medium. siRNA  
566 transfections were performed twice, 72h and 48h prior to experiments.

567

#### 568 *Whole-cell lysates and Western blotting*

569

570 Western blotting using whole-cell lysates were performed as previously described (Garay  
571 et al., 2015). Cells were lysed in Laemmli sample buffer (LSB; 0.5 M Tris, pH 6.8, glycerol, 5%  
572 bromophenol blue, 10%  $\beta$ -mercaptoethanol, 10% SDS; BioShop, Burlington, ON) containing  
573 phosphatase and protease cocktail (1 mM sodium orthovanadate, 10 nM okadaic acid, and 20 nM

574 protease inhibitor, all from BioShop, Burlington, ON). Cell Lysates were then heated to 65C for  
575 15 min, then passed through with a 27.5-gauge syringe. Proteins within whole-cell lysates were  
576 resolved by Glycine-Tris SDS-PAGE and then transferred onto a polyvinylidene fluoride  
577 (PVDF) membrane, which was then incubated with a solution containing specific primary  
578 antibodies. Western blot signal intensity detection corresponding to either phosphorylated  
579 proteins (e.g. pGSK3 $\beta$  S9), total proteins (e.g. GSK3 $\beta$ ), and the respective loading controls (e.g.  
580 actin) were obtained by signal integration in an area corresponding to the specific lane and band  
581 for each condition. The measurement of phosphorylation of a specific protein was obtained by  
582 normalization of the signal intensity of a phosphorylated form a protein to that of its loading  
583 control signal, then normalization to the signal intensity similarly obtained for the corresponding  
584 total protein.

585 To examine phosphorylation of proteins for which no specific antibodies were available,  
586 we used the phos-tag gel system, which results in exaggeration of differences in apparent  
587 molecular weight of phosphorylated forms of specific proteins (Kinoshita et al., 2006). The phos-  
588 tag reagent was obtained from Wako (Osaka, Japan), and was used for conjugation within SDS-  
589 PAGE polymerization as per the manufacturer's instructions. After SDS-PAGE was completed,  
590 gel was submerged in MnCl<sub>2</sub> for chelation of remaining phos-tag moieties. Subsequently, protein  
591 intensity detection, measurement, and processing are identical to steps mentioned above.

592

### 593 *Immunofluorescence staining*

594

595 Cells grown on glass coverslips were first subjected to fixation using cold methanol,  
596 blocked in 5% bovine serum albumin (BioShop), then stained with specific primary antibodies,  
597 followed by appropriate fluorophore-conjugated secondary antibody and counter stained with  
598 DAPI. Lastly, cells were then mounted on glass slides in fluorescence mounting medium  
599 (DAKO, Carpinteria, CA).

600

### 601 *Fluorescence microscopy*

602

603 Wide-field epifluorescence was performed on an Olympus IX83 Inverted Microscope  
604 with a 100x objective, coupled to to a Hamamatsu ORCA-Flash4.0 digital camera (Olympus

605 Canada, Richmond Hill, ON). Spinning disk confocal microscopy was performed using Quorum  
606 (Guelph, ON, Canada) Diskovery combination total internal reflection fluorescence and  
607 spinning-disc confocal microscope, operating in spinning disc confocal mode. This instrument is  
608 comprised of a Leica DMI8 microscope equipped with a 63×/1.49 NA objective with a 1.8×  
609 camera relay (total magnification 108×). Imaging was done using 488-, 561-, and 637-nm laser  
610 illumination and 527/30, 630/75, and 700/75 emission filters and acquired using a Zyla 4.2Plus  
611 sCMOS camera (Hamamatsu).

612 Structured illumination microscopy (SIM) was performed using a Zeiss Elyra PS.1 super-  
613 resolution inverted microscope, as previously described (Hua et al., 2017). Samples were imaged  
614 at an effective magnification of 101x (63x objective + 1.6x optovar tube lens) on an oil  
615 immersion objective. Typically, 25 to 35 slices of 0.110  $\mu\text{m}$  were captured for each field of view  
616 for an imaging volume of approximately 2.75 to 3.85  $\mu\text{m}$ . 488 nm, 561 nm and 643 nm laser  
617 lines were directed into the microscope optical train via a multimode fiber coupler. The lasers  
618 were passed through a diffraction grating, and a series of diffraction orders (-1, 0, +1) were  
619 projected onto the back focal plane of the objective. These wavefronts were collimated in the  
620 objective to create a three-dimensional sinusoidal illumination pattern on the sample. The  
621 diffraction grating was then rotated and translated throughout the acquisition to create patterned  
622 offset images containing encoded high spatial frequency information. Five lateral positions were  
623 acquired at each of five (72°) diffraction grating rotations for a total of 25 raw images per z-  
624 plane. SIM imaging with all lasers was carried out at exposures varying from 50 ms to 100 ms,  
625 with laser power varying between 3-10% (6-20 mW at the output), and a gain level of 60-80.  
626 Imaging parameters were adjusted iteratively to achieve the best possible equalization of pixel  
627 intensity dynamic range across channels.

628 Raw SIM image stacks were processed in Zen under the Structured Illumination toolbar.  
629 A series of parameters were set to generate an optical transfer function (OTF) used for 3D  
630 reconstruction. The noise filter for Wiener de-convolution was set to a value of  $1.0 \times 10^{-4}$  to  
631 maximize the recovery of high spatial frequency information while minimizing illumination  
632 pattern artifacts. The maximum isotropy option was left unselected to recover all available  
633 frequency information at exactly the 72° rotation angles. Negative values arising as an artifact of  
634 the Wiener filter were clipped to zero using the Baseline Cut option. Processed SIM images were

635 then aligned via an affine transformation matrix of pre-defined values obtained using 100 nm  
636 multicolor Tetraspeck fluorescent microspheres (ThermoFisher Scientific).

637

### 638 *Fluorescence microscopy image analysis*

639

640 Measurement of total cellular signal intensity of specific proteins or GSK3 $\beta$  nuclear  
641 localization index were measured using ImageJ software (National Institutes of Health,  
642 Bethesda, MD). For total cellular measurements of specific protein signal, a region of interest  
643 corresponding to the cell outline, identified manually, was used to determine raw mean cellular  
644 fluorescence intensity. Final cellular signal intensity was obtained by subtracting background  
645 fluorescence (similarly obtained from a region on the coverslip with no cells) from the raw mean  
646 cellular fluorescence intensity, as previously described (Ross et al., 2015).

647 To determine GSK3 $\beta$  nuclear localization index, background-subtracted mean  
648 fluorescence intensity of regions of interest within the nucleus and cytoplasm were obtained. The  
649 GSK3 $\beta$  nuclear localization index is the ratio of these nuclear/cytosolic intensities. Each  
650 measurement was performed in at least three independent experiments, with > 30 cells per  
651 condition, per experiment.

652 Colocalization analysis was performed by determination of Manders' or Pearson's  
653 coefficients, as indicated, using the Just Another Colocalization Plugin (Bolte and Cordelières,  
654 2006) within ImageJ, as previously described (Bone et al., 2017).

655

### 656 *Statistical analysis*

657

658 Statistical analysis was performed as previously described (Bone et al., 2017).  
659 Measurement of samples involving two experimental conditions (**Figs. 3B, 4B, 6, S2, S3A &**  
660 **S4B**) were analyzed by student's t-test, with  $p < 0.05$  as a threshold for statistically significant  
661 difference between conditions. Measurements of samples involving one experimental parameter  
662 and more than two conditions (**Figs. 1, 2B, 4A, 4C & S1**) were analyzed by one-way ANOVA,  
663 followed by Bonferonni post-test to compare differences between conditions, with  $p < 0.05$  as a  
664 threshold for statistically significant difference between conditions. Measurements of samples  
665 involving two experimental parameters (**Figures 3, 5, 7, S3B, S3C, S4C & S4D**) were analyzed

666 by two-way ANOVA, followed by Bonferonni post-test to compare differences between  
667 conditions, with  $p < 0.05$  as a threshold for statistically significant difference between conditions.

668

669 **Acknowledgements**

670

671 We thank Dr. Jim Woodgett (Lunenfeld-Tanenbaum Research Institute/Mount Sinai Hospital,  
672 Toronto, ON) and Dr. Sean Egan (Hospital for Sick Children, Toronto, ON) for insightful and  
673 helpful discussions. This work was supported by a Discovery Grant from the Natural Sciences  
674 and Engineering Research Council (of Canada), an Early Researcher Award from the Ontario  
675 Ministry of Research, Innovation and Science, and a New Investigator Award from the Canadian  
676 Institutes of Health Research to C.N.A.

677 **References**

- 678 **Abrams, H. D., Rohrschneider, L. R. and Eisenman, R. N.** (1982). Nuclear location of the  
679 putative transforming protein of avian myelocytomatosis virus. *Cell* **29**, 427–39.
- 680 **Azoulay-Alfaguter, I., Elya, R., Avrahami, L., Katz, A. and Eldar-Finkelman, H.** (2015).  
681 Combined regulation of mTORC1 and lysosomal acidification by GSK-3 suppresses  
682 autophagy and contributes to cancer cell growth. *Oncogene* **34**, 4613–4623.
- 683 **Bar-Peled, L., Schweitzer, L. D., Zoncu, R. and Sabatini, D. M.** (2012). Ragulator Is a GEF  
684 for the Rag GTPases that Signal Amino Acid Levels to mTORC1. *Cell* **150**, 1196–1208.
- 685 **Bechard, M. and Dalton, S.** (2009). Subcellular localization of glycogen synthase kinase 3beta  
686 controls embryonic stem cell self-renewal. *Mol. Cell. Biol.* **29**, 2092–104.
- 687 **Beurel, E., Grieco, S. F. and Jope, R. S.** (2015). Glycogen synthase kinase-3 (GSK3):  
688 regulation, actions, and diseases. *Pharmacol. Ther.* **148**, 114–31.
- 689 **Bijur, G. N. and Jope, R. S.** (2001). Proapoptotic Stimuli Induce Nuclear Accumulation of  
690 Glycogen Synthase Kinase-3 $\beta$ . *J. Biol. Chem.* **276**, 37436–37442.
- 691 **Bolte, S. and Cordelières, F. P.** (2006). A guided tour into subcellular colocalization analysis in  
692 light microscopy. *J. Microsc.* **224**, 213–32.
- 693 **Bone, L. N., Dayam, R. M., Lee, M., Kono, N., Fairn, G. D., Arai, H., Botelho, R. J. and**  
694 **Antonescu, C. N.** (2017). The acyltransferase LYCAT controls specific phosphoinositides  
695 and related membrane traffic. *Mol. Biol. Cell* **28**,.
- 696 **Carey, K. L., Richards, S. A., Lounsbury, K. M. and Macara, I. G.** (1996). Evidence using a  
697 green fluorescent protein-gluocorticoid receptor chimera that the Ran/TC4 GTPase  
698 mediates an essential function independent of nuclear protein import. *J. Cell Biol.* **133**, 985–  
699 96.
- 700 **Cho, K. Bin, Cho, M. K., Lee, W. Y. and Kang, K. W.** (2010). Overexpression of c-myc  
701 induces epithelial mesenchymal transition in mammary epithelial cells. *Cancer Lett.* **293**,  
702 230–9.
- 703 **Choudhury, A., Dominguez, M., Puri, V., Sharma, D. K., Narita, K., Wheatley, C. L.,**  
704 **Marks, D. L. and Pagano, R. E.** (2002). Rab proteins mediate Golgi transport of caveola-



- 705 internalized glycosphingolipids and correct lipid trafficking in Niemann-Pick C cells. *J.*  
706 *Clin. Invest.* **109**, 1541–1550.
- 707 **Chu, B.-B., Liao, Y.-C., Qi, W., Xie, C., Du, X., Wang, J., Yang, H., Miao, H.-H., Li, B.-L.**  
708 **and Song, B.-L.** (2015). Cholesterol transport through lysosome-peroxisome membrane  
709 contacts. *Cell* **161**, 291–306.
- 710 **Cianfanelli, V., Fuoco, C., Lorente, M., Salazar, M., Quondamatteo, F., Gherardini, P. F.,**  
711 **De Zio, D., Nazio, F., Antonioli, M., D’Orazio, M., et al.** (2014). AMBRA1 links  
712 autophagy to cell proliferation and tumorigenesis by promoting c-Myc dephosphorylation  
713 and degradation. *Nat. Cell Biol.* **17**, 20–30.
- 714 **Cormier, K. W. and Woodgett, J. R.** (2017). Recent advances in understanding the cellular  
715 roles of GSK-3. *F1000Research* **6**, 167.
- 716 **Cross, D. A., Alessi, D. R., Cohen, P., Andjelkovich, M. and Hemmings, B. A.** (1995).  
717 Inhibition of glycogen synthase kinase-3 by insulin mediated by protein kinase B. *Nature*  
718 **378**, 785–9.
- 719 **Dang, C. V** (2012). MYC on the path to cancer. *Cell* **149**, 22–35.
- 720 **Dang, C. V, Le, A. and Gao, P.** (2009). MYC-induced cancer cell energy metabolism and  
721 therapeutic opportunities. *Clin. Cancer Res.* **15**, 6479–83.
- 722 **Delcommenne, M., Tan, C., Gray, V., Rue, L., Woodgett, J. and Dedhar, S.** (1998).  
723 Phosphoinositide-3-OH kinase-dependent regulation of glycogen synthase kinase 3 and  
724 protein kinase B/AKT by the integrin-linked kinase. *Proc. Natl. Acad. Sci. U. S. A.* **95**,  
725 11211–6.
- 726 **Delos Santos, R., Bautista, S., Bone, L., Lucarelli, S., Dayam, R., Botelho, R. and**  
727 **Antonescu, C.** (2017). Selective control of clathrin- mediated endocytosis and clathrin-  
728 dependent signaling by phospholipase C and Ca<sup>2+</sup> signals. *Mol. Biol. Cell, under Rev.* **28**,  
729 2802–2818.
- 730 **Diehl, J. A., Cheng, M., Roussel, M. F. and Sherr, C. J.** (1998). Glycogen synthase kinase-  
731 3beta regulates cyclin D1 proteolysis and subcellular localization. *Genes Dev.* **12**, 3499–  
732 511.
- 733 **Ding, Q., Xia, W., Liu, J.-C., Yang, J.-Y., Lee, D.-F., Xia, J., Bartholomeusz, G., Li, Y., Pan,**

- 734 **Y., Li, Z., et al.** (2005). Erk Associates with and Primes GSK-3 $\beta$  for Its Inactivation  
735 Resulting in Upregulation of  $\beta$ -Catenin. *Mol. Cell* **19**, 159–170.
- 736 **Doble, B. W. and Woodgett, J. R.** (2003). GSK-3: tricks of the trade for a multi-tasking kinase.  
737 *J. Cell Sci.* **116**, 1175–86.
- 738 **Fang, X., Yu, S. X., Lu, Y., Bast, R. C., Woodgett, J. R. and Mills, G. B.** (2000).  
739 Phosphorylation and inactivation of glycogen synthase kinase 3 by protein kinase A. *Proc.*  
740 *Natl. Acad. Sci. U. S. A.* **97**, 11960–5.
- 741 **Feijs, K. L., Kleine, H., Braczynski, A., Forst, A. H., Herzog, N., Verheugd, P., Linzen, U.,**  
742 **Kremmer, E. and Lüscher, B.** (2013). ARTD10 substrate identification on protein  
743 microarrays: regulation of GSK3 $\beta$  by mono-ADP-ribosylation. *Cell Commun. Signal.* **11**, 5.
- 744 **Fekri, F., Delos Santos, R., Karshafian, R. and Antonescu, C.** (2016). Ultrasound  
745 microbubble treatment enhances clathrin-mediated endocytosis and fluid-phase uptake  
746 through distinct mechanisms. *PLoS One* **11**, e0156754.
- 747 **Fiol, C. J., Williams, J. S., Chou, C. H., Wang, Q. M., Roach, P. J. and Andrisani, O. M.**  
748 (1994). A secondary phosphorylation of CREB341 at Ser129 is required for the cAMP-  
749 mediated control of gene expression. A role for glycogen synthase kinase-3 in the control of  
750 gene expression. *J. Biol. Chem.* **269**, 32187–93.
- 751 **Flinn, R. J., Yan, Y., Goswami, S., Parker, P. J. and Backer, J. M.** (2010). The Late  
752 Endosome is Essential for mTORC1 Signaling. *Mol. Biol. Cell* **21**, 833–841.
- 753 **Garay, C., Judge, G., Lucarelli, S., Bautista, S., Pandey, R., Singh, T. and Antonescu, C. N.**  
754 (2015). Epidermal growth factor-stimulated Akt phosphorylation requires clathrin or ErbB2  
755 but not receptor endocytosis. *Mol. Biol. Cell* **26**,.
- 756 **Goñi-Oliver, P., Lucas, J. J., Avila, J. and Hernández, F.** (2007). N-terminal cleavage of  
757 GSK-3 by calpain: a new form of GSK-3 regulation. *J. Biol. Chem.* **282**, 22406–13.
- 758 **Gregory, M. A., Qi, Y. and Hann, S. R.** (2003). Phosphorylation by glycogen synthase kinase-  
759 3 controls c-myc proteolysis and subnuclear localization. *J. Biol. Chem.* **278**, 51606–12.
- 760 **Hann, S. R., Abrams, H. D., Rohrschneider, L. R. and Eisenman, R. N.** (1983). Proteins  
761 encoded by v-myc and c-myc oncogenes: identification and localization in acute leukemia  
762 virus transformants and bursal lymphoma cell lines. *Cell* **34**, 789–98.

- 763 **Hua, R., Cheng, D., Coyaud, É., Freeman, S., Di Pietro, E., Wang, Y., Vissa, A., Yip, C. M.,**  
764 **Fairn, G. D., Braverman, N., et al.** (2017). VAPs and ACBD5 tether peroxisomes to the  
765 ER for peroxisome maintenance and lipid homeostasis. *J. Cell Biol.* **216**, 367–377.
- 766 **Inoki, K., Li, Y., Zhu, T., Wu, J. and Guan, K.-L.** (2002). TSC2 is phosphorylated and  
767 inhibited by Akt and suppresses mTOR signalling. *Nat. Cell Biol.* **4**, 648–657.
- 768 **Inoki, K., Li, Y., Xu, T. and Guan, K.-L.** (2003). Rheb GTPase is a direct target of TSC2 GAP  
769 activity and regulates mTOR signaling. *Genes Dev.* **17**, 1829–34.
- 770 **Inoki, K., Ouyang, H., Zhu, T., Lindvall, C., Wang, Y., Zhang, X., Yang, Q., Bennett, C.,**  
771 **Harada, Y., Stankunas, K., et al.** (2006). TSC2 Integrates Wnt and Energy Signals via a  
772 Coordinated Phosphorylation by AMPK and GSK3 to Regulate Cell Growth. *Cell* **126**,  
773 955–968.
- 774 **Inoki, K., Kim, J. and Guan, K.-L.** (2012). AMPK and mTOR in Cellular Energy Homeostasis  
775 and Drug Targets. *Annu. Rev. Pharmacol. Toxicol.* **52**, 381–400.
- 776 **Joep, R. S. and Johnson, G. V. .** (2004). The glamour and gloom of glycogen synthase kinase-  
777 3. *Trends Biochem. Sci.* **29**, 95–102.
- 778 **Jung, C. H., Jun, C. B., Ro, S.-H., Kim, Y.-M., Otto, N. M., Cao, J., Kundu, M. and Kim,**  
779 **D.-H.** (2009). ULK-Atg13-FIP200 complexes mediate mTOR signaling to the autophagy  
780 machinery. *Mol. Biol. Cell* **20**, 1992–2003.
- 781 **Ka, M., Condorelli, G., Woodgett, J. R. and Kim, W.-Y.** (2014). mTOR regulates brain  
782 morphogenesis by mediating GSK3 signaling. *Development* **141**, 4076–4086.
- 783 **Kalkat, M., De Melo, J., Hickman, K. A., Lourenco, C., Redel, C., Resetca, D., Tamachi, A.,**  
784 **Tu, W. B. and Penn, L. Z.** (2017). MYC Deregulation in Primary Human Cancers. *Genes*  
785 *(Basel)*. **8**, 151.
- 786 **Kaushik, S., Massey, A. C. and Cuervo, A. M.** (2006). Lysosome membrane lipid  
787 microdomains: novel regulators of chaperone-mediated autophagy. *EMBO J.* **25**, 3921–33.
- 788 **Kinoshita, E., Kinoshita-Kikuta, E., Takiyama, K. and Koike, T.** (2006). Phosphate-binding  
789 tag, a new tool to visualize phosphorylated proteins. *Mol. Cell. Proteomics* **5**, 749–57.
- 790 **Li, Y., Xu, M., Ding, X., Yan, C., Song, Z., Chen, L., Huang, X., Wang, X., Jian, Y., Tang,**

- 791 **G., et al.** (2016). Protein kinase C controls lysosome biogenesis independently of  
792 mTORC1. *Nat. Cell Biol.* **18**, 1065–1077.
- 793 **Linding, R., Jensen, L. J., Ostheimer, G. J., van Vugt, M. A. T. M., Jørgensen, C., Miron, I.**  
794 **M., Diella, F., Colwill, K., Taylor, L., Elder, K., et al.** (2007). Systematic Discovery of In  
795 Vivo Phosphorylation Networks. *Cell* **129**, 1415–1426.
- 796 **Long, X., Lin, Y., Ortiz-Vega, S., Yonezawa, K. and Avruch, J.** (2005). Rheb Binds and  
797 Regulates the mTOR Kinase. *Curr. Biol.* **15**, 702–713.
- 798 **Lüscher, B. and Eisenman, R. N.** (1988). c-myc and c-myb protein degradation: effect of  
799 metabolic inhibitors and heat shock. *Mol. Cell. Biol.* **8**, 2504–12.
- 800 **Meares, G. P. and Jope, R. S.** (2007). Resolution of the nuclear localization mechanism of  
801 glycogen synthase kinase-3: functional effects in apoptosis. *J. Biol. Chem.* **282**, 16989–  
802 7001.
- 803 **Miller, D. M., Thomas, S. D., Islam, A., Muench, D. and Sedoris, K.** (2012). c-Myc and  
804 cancer metabolism. *Clin. Cancer Res.* **18**, 5546–53.
- 805 **Nikolakaki, E., Coffey, P. J., Hemelsoet, R., Woodgett, J. R. and Defize, L. H.** (1993).  
806 Glycogen synthase kinase 3 phosphorylates Jun family members in vitro and negatively  
807 regulates their transactivating potential in intact cells. *Oncogene* **8**, 833–40.
- 808 **Reis, C. R., Chen, P.-H., Srinivasan, S., Aguet, F., Mettlen, M. and Schmid, S. L.** (2015).  
809 Crosstalk between Akt/GSK3 $\beta$  signaling and dynamin-1 regulates clathrin-mediated  
810 endocytosis. *EMBO J.* **34**, 2132–46.
- 811 **Ross, S. E., Erickson, R. L., Hemati, N. and MacDougald, O. A.** (1999). Glycogen synthase  
812 kinase 3 is an insulin-regulated C/EBP $\alpha$  kinase. *Mol. Cell. Biol.* **19**, 8433–41.
- 813 **Ross, E., Ata, R., Thavarajah, T., Medvedev, S., Bowden, P., Marshall, J. G. and**  
814 **Antonescu, C. N.** (2015). AMP-activated protein kinase regulates the cell surface proteome  
815 and integrin membrane traffic. *PLoS One* **10**, e0128013.
- 816 **Sancak, Y., Peterson, T. R., Shaul, Y. D., Lindquist, R. A., Thoreen, C. C., Bar-Peled, L.**  
817 **and Sabatini, D. M.** (2008). The Rag GTPases bind raptor and mediate amino acid  
818 signaling to mTORC1. *Science* **320**, 1496–501.

- 819 **Saric, A., Hipolito, V. E. B., Kay, J. G., Canton, J., Antonescu, C. N. and Botelho, R. J.**  
820 (2016). mTOR controls lysosome tubulation and antigen presentation in macrophages and  
821 dendritic cells. *Mol. Biol. Cell* **27**, 321–33.
- 822 **Saxton, R. A. and Sabatini, D. M.** (2017). mTOR Signaling in Growth, Metabolism, and  
823 Disease. *Cell* **168**, 960–976.
- 824 **Schenck, A., Goto-Silva, L., Collinet, C., Rhinn, M., Giner, A., Habermann, B., Brand, M.**  
825 **and Zerial, M.** (2008). The Endosomal Protein Appl1 Mediates Akt Substrate Specificity  
826 and Cell Survival in Vertebrate Development. *Cell* **133**, 486–497.
- 827 **Sekiya, S. and Suzuki, A.** (2011). Glycogen synthase kinase 3  $\beta$ -dependent Snail degradation  
828 directs hepatocyte proliferation in normal liver regeneration. *Proc. Natl. Acad. Sci. U. S. A.*  
829 **108**, 11175–80.
- 830 **Shaw, R. J., Bardeesy, N., Manning, B. D., Lopez, L., Kosmatka, M., DePinho, R. A. and**  
831 **Cantley, L. C.** (2004). The LKB1 tumor suppressor negatively regulates mTOR signaling.  
832 *Cancer Cell* **6**, 91–9.
- 833 **Smith, K. P., Byron, M., O’Connell, B. C., Tam, R., Schorl, C., Guney, I., Hall, L. L.,**  
834 **Agrawal, P., Sedivy, J. M. and Lawrence, J. B.** (2004). c-Myc localization within the  
835 nucleus: evidence for association with the PML nuclear body. *J. Cell. Biochem.* **93**, 1282–  
836 96.
- 837 **Stadler, S. C., Vincent, C. T., Fedorov, V. D., Patsialou, A., Cherrington, B. D., Wakshlag,**  
838 **J. J., Mohanan, S., Zee, B. M., Zhang, X., Garcia, B. A., et al.** (2013). Dysregulation of  
839 PAD4-mediated citrullination of nuclear GSK3 $\beta$  activates TGF- $\beta$  signaling and induces  
840 epithelial-to-mesenchymal transition in breast cancer cells. *Proc. Natl. Acad. Sci. U. S. A.*  
841 **110**, 11851–6.
- 842 **Stambolic, V. and Woodgett, J. R.** (1994). Mitogen inactivation of glycogen synthase kinase-3  
843 beta in intact cells via serine 9 phosphorylation. *Biochem. J.* **303 ( Pt 3)**, 701–4.
- 844 **Strambio-De-Castillia, C., Niepel, M. and Rout, M. P.** (2010). The nuclear pore complex:  
845 bridging nuclear transport and gene regulation. *Nat. Rev. Mol. Cell Biol.* **11**, 490–501.
- 846 **Stretton, C., Hoffmann, T. M., Munson, M. J., Prescott, A., Taylor, P. M., Ganley, I. G. and**  
847 **Hundal, H. S.** (2015). GSK3-mediated raptor phosphorylation supports amino-acid-

- 848 dependent mTORC1-directed signalling. *Biochem. J.* **470**, 207–221.
- 849 **Sutherland, C.** (2011). What Are the *bona fide* GSK3 Substrates? *Int. J. Alzheimers. Dis.* **2011**,  
850 1–23.
- 851 **Sutherland, C., Leighton, I. A. and Cohen, P.** (1993). Inactivation of glycogen synthase  
852 kinase-3 beta by phosphorylation: new kinase connections in insulin and growth-factor  
853 signalling. *Biochem. J.* **296 ( Pt 1)**, 15–9.
- 854 **Suzuki, T., Bridges, D., Nakada, D., Skiniotis, G., Morrison, S. J., Lin, J. D., Saltiel, A. R.**  
855 **and Inoki, K.** (2013). Inhibition of AMPK Catabolic Action by GSK3. *Mol. Cell* **50**, 407–  
856 419.
- 857 **Taelman, V. F., Dobrowolski, R., Plouhinec, J.-L., Fuentealba, L. C., Vorwald, P. P.,**  
858 **Gumper, I., Sabatini, D. D. and De Robertis, E. M.** (2010). Wnt Signaling Requires  
859 Sequestration of Glycogen Synthase Kinase 3 inside Multivesicular Endosomes. *Cell* **143**,  
860 1136–1148.
- 861 **Tang, Q.-Q., Gronborg, M., Huang, H., Kim, J.-W., Otto, T. C., Pandey, A. and Lane, M.**  
862 **D.** (2005). Sequential phosphorylation of CCAAT enhancer-binding protein by MAPK and  
863 glycogen synthase kinase 3 is required for adipogenesis. *Proc. Natl. Acad. Sci.* **102**, 9766–  
864 9771.
- 865 **Tee, A. R., Manning, B. D., Roux, P. P., Cantley, L. C. and Blenis, J.** (2003). Tuberous  
866 sclerosis complex gene products, Tuberin and Hamartin, control mTOR signaling by acting  
867 as a GTPase-activating protein complex toward Rheb. *Curr. Biol.* **13**, 1259–68.
- 868 **Thomas, L. R. and Tansey, W. P.** (2011). Proteolytic Control of the Oncoprotein Transcription  
869 Factor Myc. In *Advances in cancer research*, pp. 77–106.
- 870 **Thornton, T. M., Pedraza-Alva, G., Deng, B., Wood, C. D., Aronshtam, A., Clements, J. L.,**  
871 **Sabio, G., Davis, R. J., Matthews, D. E., Doble, B., et al.** (2008). Phosphorylation by p38  
872 MAPK as an Alternative Pathway for GSK3 Inactivation. *Science (80-. ).* **320**, 667–670.
- 873 **Tsuji, I., Tanaka, T., Kudo, T., Nishikawa, T., Shinozaki, K., Grundke-Iqbal, I., Iqbal, K.**  
874 **and Takeda, M.** (2000). Inactivation of glycogen synthase kinase-3 by protein kinase C  
875 delta: implications for regulation of tau phosphorylation. *FEBS Lett.* **469**, 111–7.
- 876 **Vanlandingham, P. A. and Ceresa, B. P.** (2009). Rab7 regulates late endocytic trafficking

- 877 downstream of multivesicular body biogenesis and cargo sequestration. *J. Biol. Chem.* **284**,  
878 12110–24.
- 879 **Wiechens, N. and Fagotto, F.** (2001). CRM1- and Ran-independent nuclear export of  $\beta$ -catenin.  
880 *Curr. Biol.* **11**, 18–28.
- 881 **Woodgett, J. R.** (1990). Molecular cloning and expression of glycogen synthase kinase-3/factor  
882 A. *EMBO J.* **9**, 2431–8.
- 883 **Wu, D. and Pan, W.** (2010). GSK3: a multifaceted kinase in Wnt signaling. *Trends Biochem.*  
884 *Sci.* **35**, 161–168.
- 885 **Zeng, X., Huang, H., Tamai, K., Zhang, X., Harada, Y., Yokota, C., Almeida, K., Wang, J.,**  
886 **Doble, B., Woodgett, J., et al.** (2008). Initiation of Wnt signaling: control of Wnt  
887 coreceptor Lrp6 phosphorylation/activation via frizzled, dishevelled and axin functions.  
888 *Development* **135**, 367–75.
- 889 **Zhou, B. P., Deng, J., Xia, W., Xu, J., Li, Y. M., Gunduz, M. and Hung, M.-C.** (2004). Dual  
890 regulation of Snail by GSK-3 $\beta$ -mediated phosphorylation in control of epithelial–  
891 mesenchymal transition. *Nat. Cell Biol.* **6**, 931–940.
- 892 **Zmijewski, J. W. and Jope, R. S.** (2004). Nuclear accumulation of glycogen synthase kinase-3  
893 during replicative senescence of human fibroblasts. *Aging Cell* **3**, 309–17.
- 894 **Zoncu, R., Perera, R. M., Balkin, D. M., Pirruccello, M., Toomre, D. and De Camilli, P.**  
895 (2009). A Phosphoinositide Switch Controls the Maturation and Signaling Properties of  
896 APPL Endosomes. *Cell* **136**, 1110–1121.
- 897 **Zoncu, R., Bar-Peled, L., Efeyan, A., Wang, S., Sancak, Y. and Sabatini, D. M.** (2011).  
898 mTORC1 senses lysosomal amino acids through an inside-out mechanism that requires the  
899 vacuolar H(+)-ATPase. *Science* **334**, 678–83.
- 900

901 **Figure Legends**

902

903 **Figure 1. mTORC1 inhibition decreases c-myc and snail expression in a GSK3 $\beta$ -dependent**  
904 **manner.** (A-B) RPE cells were treated with 1  $\mu$ M Rapamycin, in the presence or absence of 10  
905  $\mu$ M CHIR 99021 for the indicated times (A) or 1 h (B). Shown are representative immunoblots of  
906 whole-cell lysates probed with anti-c-myc (A), anti-snail (B) or anti-clathrin heavy chain (load)  
907 antibodies. Also shown are mean c-myc levels  $\pm$  SE, n = 6, \*  $p < 0.05$  (A), or mean snail levels  
908 n=3; \*,  $p < 0.05$  (B), relative to that in the control conditions (no inhibitor treatment). (C) RPE  
909 cells were transfected with siRNA targeting GSK3 $\beta$  or non-targeting siRNA (control), then  
910 treated with either 10  $\mu$ M LY294002, 5  $\mu$ M Akti-1/2, or 1  $\mu$ M Rapamycin for 1 h. Shown are  
911 representative immunoblots of whole-cell lysates probed with anti-c-myc or anti-actin (load)  
912 antibodies, as well as mean c-myc levels, n = 4; \*  $p < 0.05$ , relative to that in the control  
913 conditions (no inhibitor treatment).

914

915 **Figure 2. Inhibition of PI3K/Akt/mTORC1 signals promotes GSK3 $\beta$  nuclear localization.**  
916 (A) Representative images obtained by widefield epifluorescence microscopy of control RPE  
917 cells (no inhibitor treatment) stained to detect endogenous GSK3 $\beta$  or c-myc, with DAPI stain to  
918 identify the nucleus, scale = 20  $\mu$ m. (B) RPE cells were treated with either 10  $\mu$ M LY294002, 5  
919  $\mu$ M Akti-1/2, or 1  $\mu$ M Rapamycin for 1 h, then fixed and stained to detect endogenous GSK3 $\beta$ .  
920 Shown (left panel) are micrographs obtained by widefield epifluorescence microscopy  
921 representative of 3 independent experiments, scale = 20  $\mu$ m. Also shown for each condition as  
922 ‘GSK3 $\beta$  overlay’ are sample cellular and nuclear outlines, and a box corresponding to a  
923 magnified image of a single cell. Also shown (right panel) is the mean GSK3 $\beta$  nuclear  
924 localization index  $\pm$  SE (n = 3, >30 cells per condition per experiment); \*,  $p < 0.05$  relative to  
925 control conditions (no inhibitor treatment).

926

927 **Figure 3. Rapamycin-induced GSK3 $\beta$  nuclear localization is Ran-dependent.** (A) RPE cells  
928 were transfected with plasmids encoding HA-tagged wild-type (WT), T24N or G19V Ran, then  
929 treated with 1  $\mu$ M Rapamycin for 1 h, followed by detection of endogenous GSK3 $\beta$  and  
930 exogenous HA-tagged Ran proteins. Shown (top panel) are micrographs obtained by widefield  
931 epifluorescence microscopy representative of 3 independent experiments, scale = 20  $\mu$ m. Also



932 shown for each condition as ‘GSK3 $\beta$  overlay’ are sample cellular and nuclear outlines, and a box  
933 corresponding to a magnified image of a single cell. Also shown (bottom panel) is the mean  
934 GSK3 $\beta$  nuclear localization index  $\pm$  SE (n = 3, >30 cells per condition per experiment); \*,  $p$  <  
935 0.05 relative to control conditions (no inhibitor treatment).

936

937 **Figure 4. mTORC1 integrates multiple signals to control GSK3 $\beta$  nuclear localization.** RPE  
938 cells were treated with either 100  $\mu$ M A769662, 5  $\mu$ M Compound C, or 1  $\mu$ M Rapamycin, alone  
939 or in combination for 1h (**A**), or 1  $\mu$ M Concanamycin for 1h (**B**), or incubated in amino acid-free  
940 EBSS media for 2h (**C**). Shown (left panels) in each case are micrographs obtained by widefield  
941 epifluorescence microscopy representative of 3 independent experiments, scale = 20  $\mu$ m. Also  
942 shown for each condition as ‘GSK3 $\beta$  overlay’ are sample cellular and nuclear outlines, and a box  
943 corresponding to a magnified image of a single cell. Also shown (right panels) are the mean  
944 GSK3 $\beta$  nuclear localization indices  $\pm$  SE (n = 3, >30 cells per condition per experiment); \*,  $p$  <  
945 0.05 relative to control conditions (no inhibitor treatment).

946

947 **Figure 5. GSK3 $\beta$  S9 phosphorylation is not required for GSK3 $\beta$  nuclear localization**  
948 **induced by inhibition of PI3K-Akt-mTORC1 signals.** (**A**) RPE cells were treated either 10  $\mu$ M  
949 LY294002, 5  $\mu$ M Akti-1/2, or 1  $\mu$ M Rapamycin for 1 h. Shown are representative immunoblots  
950 of whole-cell lysates probed with anti-pS9 GSK3 $\beta$  or anti-total GSK3 $\beta$  antibodies. Also shown  
951 are mean anti-pS9 GSK3 $\beta$  levels (normalized to total GSK3 $\beta$ )  $\pm$  SE, n = 3, \*  $p$  < 0.05, relative to  
952 that in the control conditions (no inhibitor treatment). (**B**) RPE cells were transfected with  
953 plasmids encoding HA-tagged wild-type (WT) or S9A GSK3 $\beta$  then treated with 5  $\mu$ M Akti-1/2  
954 for 1 h, followed by detection of exogenous HA-GSK3 $\beta$  proteins. Shown (top panel) are  
955 micrographs obtained by widefield epifluorescence microscopy representative of 3 independent  
956 experiments, scale = 20  $\mu$ m. Also shown for each condition as ‘HA-GSK3 $\beta$  overlay’ are sample  
957 cellular and nuclear outlines, and a box corresponding to a magnified image of a single cell.  
958 Also shown (bottom panel) is the mean HA-GSK3 $\beta$  nuclear localization index  $\pm$  SE (n = 3, >30  
959 cells per condition per experiment); \*,  $p$  < 0.05 relative to control conditions (no inhibitor  
960 treatment).

961

962 **Figure 6. GSK3 $\beta$  exhibits partial localization to several distinct endomembrane**  
963 **compartments.** (A-C) RPE cells were fixed and stained to detect endogenous GSK3 $\beta$ , together  
964 with either endogenous APPL1 (A), EEA1 (B), or LAMP1 (C). Shown are representative images  
965 obtained by spinning-disc confocal microscopy, corresponding to a z-section through the middle  
966 of the cell, scale 20  $\mu$ m (left panels). Also shown (right panels) are the mean  $\pm$  SE of Manders'  
967 coefficient to measure overlap of GSK3 $\beta$  signals with either APPL1 (A), EEA1 (B), or LAMP1  
968 (C) (n = 3, > 30 cells per condition per experiment). For each image set, Manders' coefficients  
969 were calculated for actual images (labelled 'actual'), as well as images in which the spatial  
970 position of one of the channels had been randomized (labelled 'rand.'). to allow resolution of  
971 specific GSK3 $\beta$  localization to various endomembrane compartments from random overlap of  
972 signals in a field densely populated with fluorescent objects. (D) RPE cell samples prepared  
973 similarly as in (C) were subjected to structured illumination microscopy (SIM). Shown are  
974 representative micrographs of (endogenous) GSK3 $\beta$  and LAMP1 staining morphology, scale 5  
975  $\mu$ m (top panels) or 1  $\mu$ m (bottom panel).

976

977 **Figure 7. Rab7 controls GSK3 $\beta$  nuclear localization and GSK3 $\beta$ -dependent c-myc**  
978 **expression.** RPE cells were transfected with plasmids encoding dsRed-tagged wild-type (WT) or  
979 T22N Rab7, then treated with 1  $\mu$ M rapamycin for 1 h, followed by detection of endogenous  
980 GSK3 $\beta$  (A) or c-myc (B). Shown (left panels) are micrographs obtained by widefield  
981 epifluorescence microscopy representative of 3 independent experiments, scale = 20  $\mu$ m. Also  
982 shown for each condition as 'GSK3 $\beta$  overlay' (A) or 'c-myc overlay' (B) are sample cellular and  
983 nuclear outlines, and a box corresponding to a magnified image of a single cell. Also shown  
984 (right panels) is the mean  $\pm$  SE of the GSK3 $\beta$  nuclear localization index (A) (n = 3, >30 cells per  
985 condition per experiment) or total cellular c-myc level (B) (n = 3, >30 cells per condition per  
986 experiment); \*,  $p < 0.05$  relative to control conditions (no inhibitor treatment).

# Figure 1

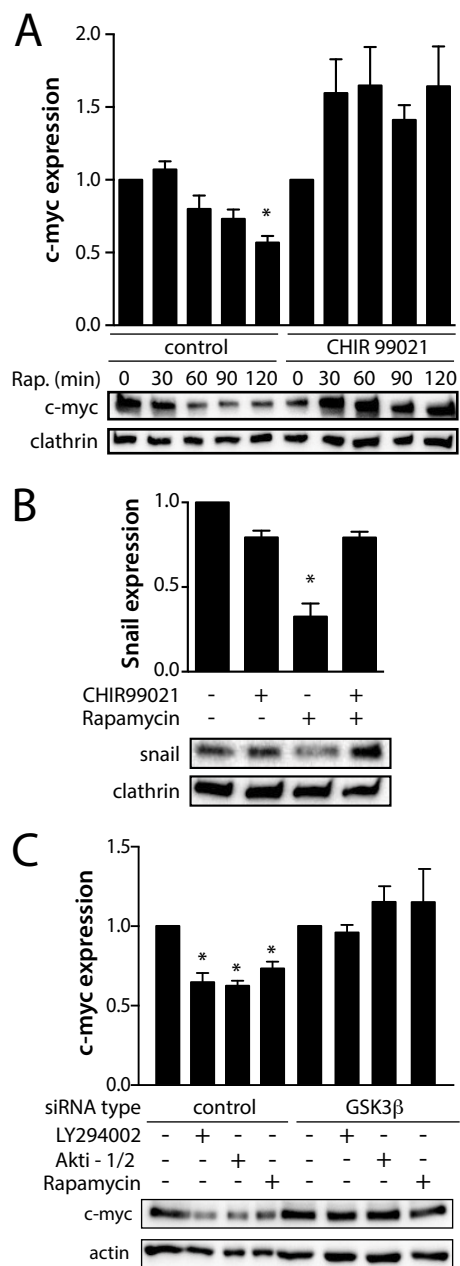

## Figure 2

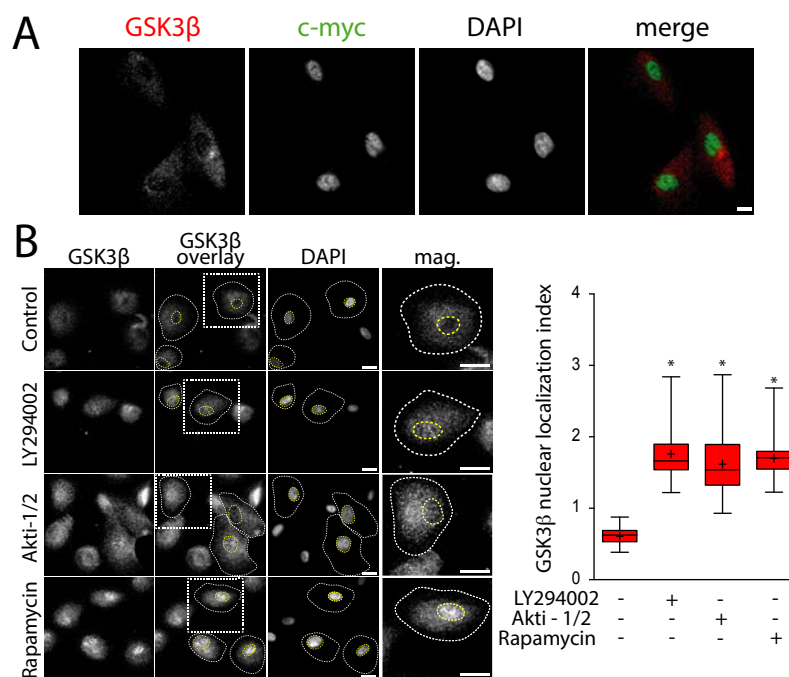

Figure 3

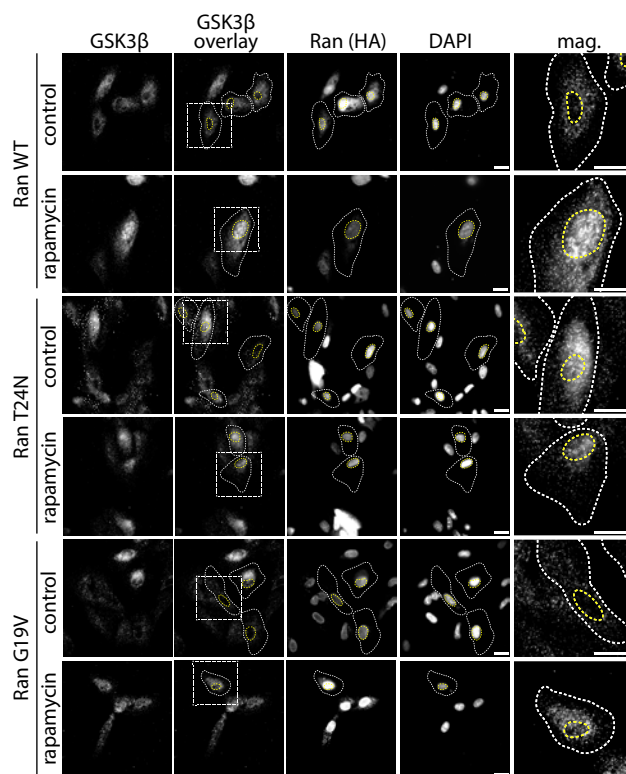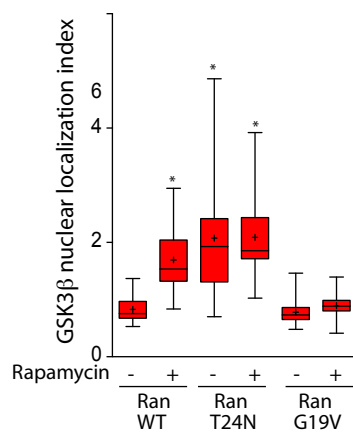

## Figure 4

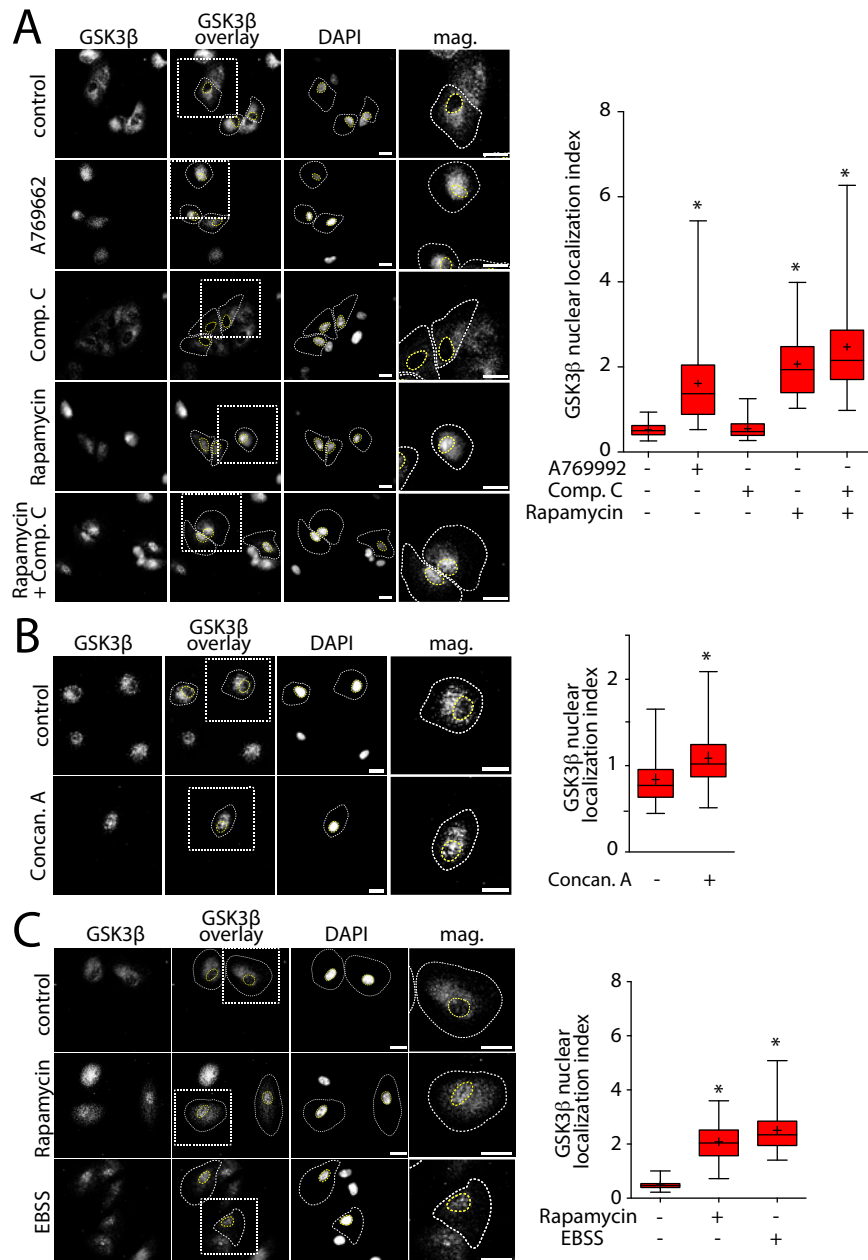

## Figure 5

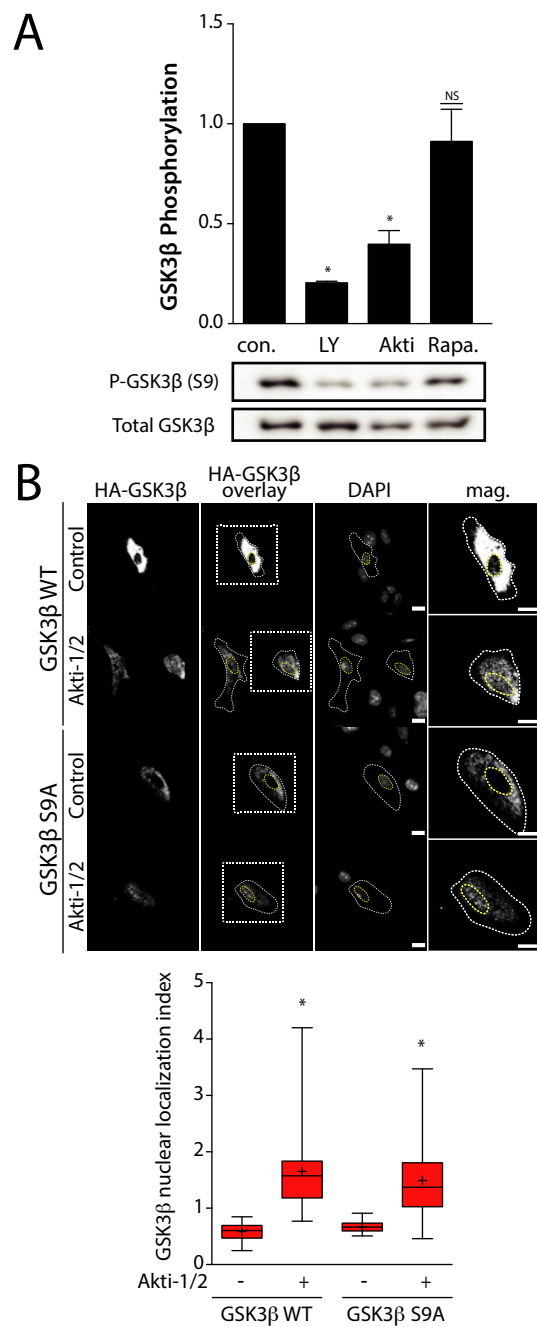

## Figure 6

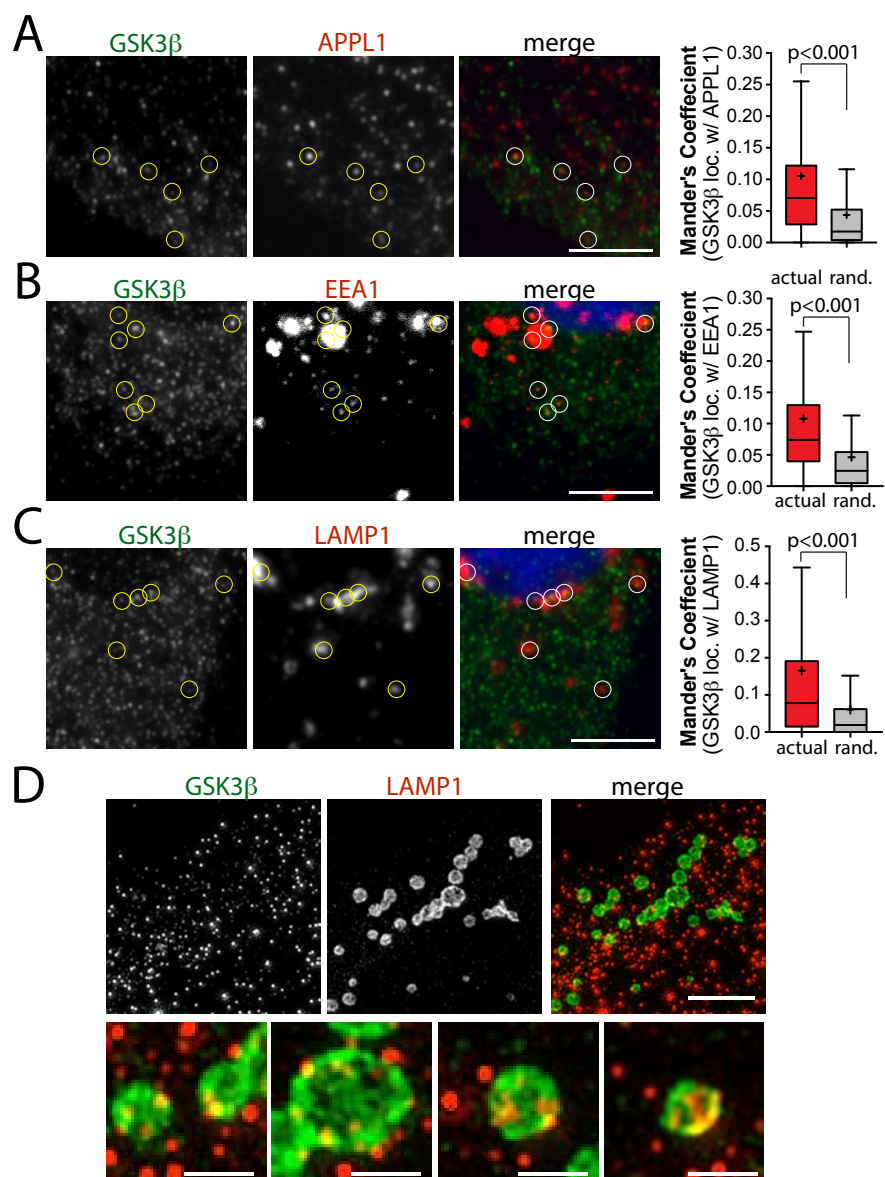



## Figure 7

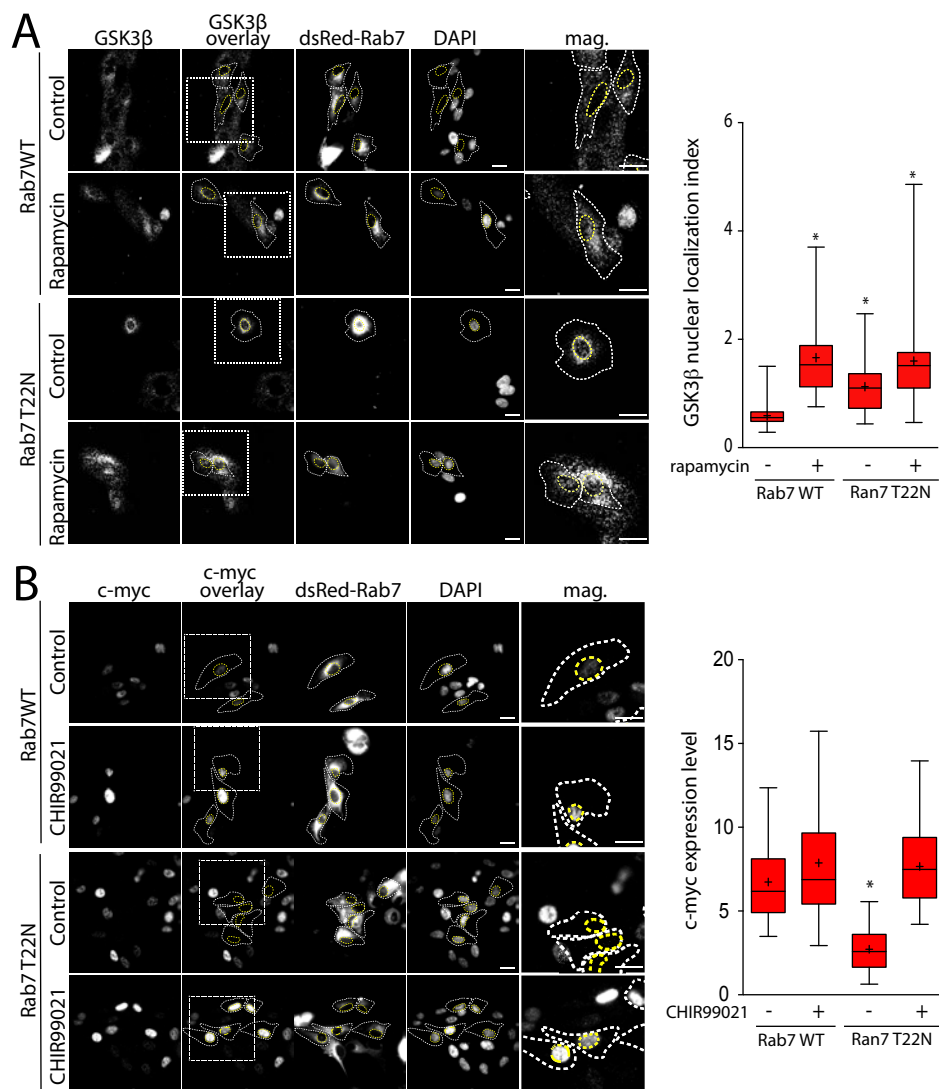

Source: https://www.biorxiv.org/content/10.1101/277657v1.full.pdf
